# Supplementary material for: Deep eutectic solvent supported TEMPO for oxidation of alcohols
Source: Royal Society of Chemistry journal article supplement (doi:10.1039/c4ra05598e), 2014-09-05
Supplement: c4ra05598e1.pdf [file c4ra05598e1.pdf]

### Contents of Characterization Spectrograms

|                                                                                                                                                              |    |
|--------------------------------------------------------------------------------------------------------------------------------------------------------------|----|
| Fig1. <sup>1</sup> H NMR of the sample of 4-(2, 2, 6, 6-Tetramethyl-1-oxyl-4-piperidoxyl) butyl bromide reduced by phenylhydrazine (CDCl <sub>3</sub> )..... | 2  |
| Fig2. <sup>1</sup> H NMR of the sample of [Quaternium-TEMPO] <sup>+</sup> Br <sup>-</sup> reduced by phenylhydrazine (CDCl <sub>3</sub> ) .....              | 3  |
| Fig3. <sup>13</sup> C NMR of the sample of [Quaternium-TEMPO] <sup>+</sup> Br <sup>-</sup> reduced by phenylhydrazine (CDCl <sub>3</sub> ) .....             | 4  |
| Fig4. HR-MS (ESI) of [Quaternium-TEMPO] <sup>+</sup> .....                                                                                                   | 5  |
| Fig5. <sup>1</sup> H NMR of Benzaldehyde (entry 1) (CDCl <sub>3</sub> ).....                                                                                 | 5  |
| Fig6. <sup>1</sup> H NMR of 4-Methoxybenzaldehyde (entry 2) (CDCl <sub>3</sub> ).....                                                                        | 6  |
| Fig7. <sup>1</sup> H NMR of 2-Methoxybenzaldehyde (entry 3) (CDCl <sub>3</sub> ).....                                                                        | 6  |
| Fig8. <sup>1</sup> H NMR of 3-Methoxybenzaldehyde (entry 4) (CDCl <sub>3</sub> ).....                                                                        | 7  |
| Fig9. <sup>1</sup> H NMR of 4-Methylbenzaldehyde (entry 5) (CDCl <sub>3</sub> ).....                                                                         | 7  |
| Fig10. <sup>1</sup> H NMR of 4-Chlorobenzaldehyde (entry 6) (CDCl <sub>3</sub> ) .....                                                                       | 8  |
| Fig11. <sup>1</sup> H NMR of 2-Chlorobenzaldehyde (entry 7) ( (CD <sub>3</sub> ) <sub>2</sub> CO ) .....                                                     | 8  |
| Fig12. <sup>1</sup> H NMR of 4-Fluorobenzaldehyde (entry 8) (CDCl <sub>3</sub> ) .....                                                                       | 9  |
| Fig13. <sup>1</sup> H NMR of 2-Fluorobenzaldehyde (entry 9) (CDCl <sub>3</sub> ) .....                                                                       | 9  |
| Fig14. <sup>1</sup> H NMR of 3,5-Difluorobenzaldehyde (entry 10) (CDCl <sub>3</sub> ) .....                                                                  | 10 |
| Fig15. <sup>1</sup> H NMR of Cinnamaldehyde (entry 11) (CDCl <sub>3</sub> ) .....                                                                            | 10 |
| Fig16. <sup>1</sup> H NMR of 2-Thenaldehyde (entry 12) (CDCl <sub>3</sub> ) .....                                                                            | 11 |
| Fig17. <sup>1</sup> H NMR of 2-pyridinecarboxaldehyde (entry 13) (CDCl <sub>3</sub> ) .....                                                                  | 11 |
| Fig18. <sup>1</sup> H NMR of Butanal (entry 14) (CDCl <sub>3</sub> ) .....                                                                                   | 12 |
| Fig19. <sup>1</sup> H NMR of Acetophenone (entry 15) (CDCl <sub>3</sub> ) .....                                                                              | 12 |
| Fig20. <sup>1</sup> H NMR of 4-Methylacetophenone (entry 16) (CDCl <sub>3</sub> ).....                                                                       | 13 |
| Fig21. <sup>1</sup> H NMR of 2-Chloroacetophenone (entry 17) (CDCl <sub>3</sub> ) .....                                                                      | 13 |
| Fig22. <sup>1</sup> H NMR of 4-Chloroacetophenone (entry 18) ( (CD <sub>3</sub> ) <sub>2</sub> SO ).....                                                     | 14 |
| Fig23. <sup>1</sup> H NMR of Cyclohexanone (entry 19) (CDCl <sub>3</sub> ).....                                                                              | 14 |
| Fig24. <sup>1</sup> H NMR of 2-Octanone (entry 20) (CDCl <sub>3</sub> ).....                                                                                 | 15 |
| Fig25. <sup>1</sup> H NMR of 1,2,3,4-Tetrahydro-1-naphthalenone (entry 21) ( (CD <sub>3</sub> ) <sub>2</sub> SO ) .....                                      | 15 |

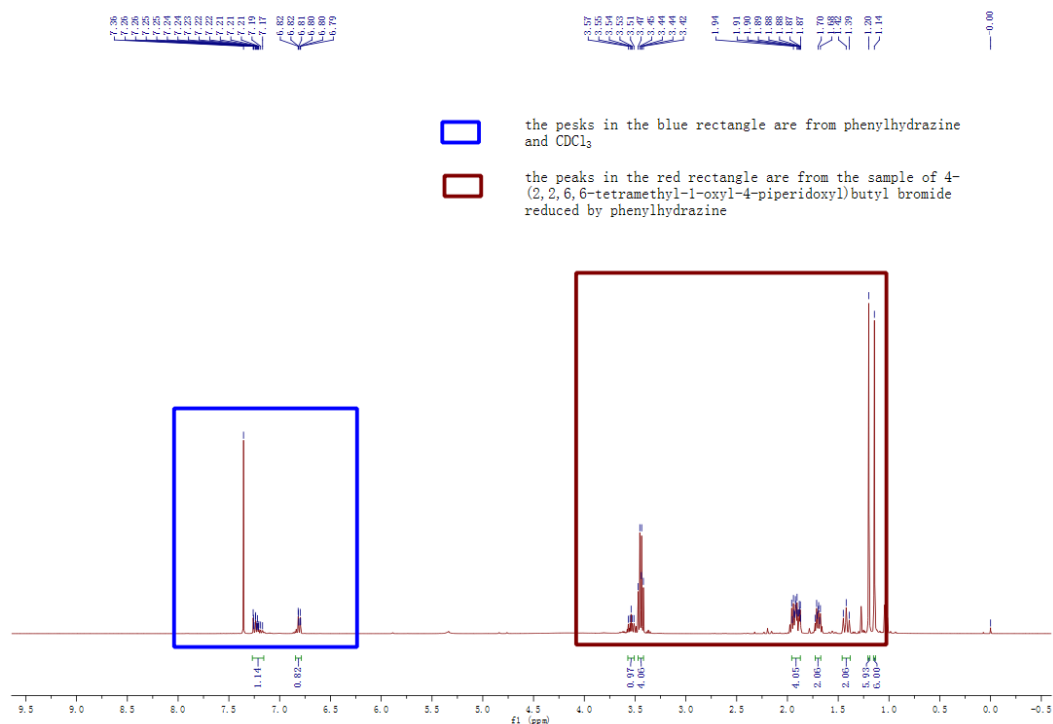

**Fig1.  $^1\text{H}$  NMR of the sample of 4-(2,2,6,6-Tetramethyl-1-oxyl-4-piperidoxyl) butyl bromide reduced by phenylhydrazine ( $\text{CDCl}_3$ )**

$^1\text{H}$  NMR (400 MHz;  $\text{CDCl}_3$ ;  $\text{Me}_4\text{Si}$ )  $\delta$ : 1.14 (6H, s, Piperidine-Me), 1.20 (6H, s, Piperidine-Me), 1.42 (2H, t,  $J = 11.6$  Hz, Piperidine- $\text{CHH}$ ), 1.66-1.70 (2H, m,  $\text{O-CH}_2\text{-CH}_2\text{-CH}_2\text{-CH}_2\text{-Br}$ ), 1.87-1.94 (4H, m,  $\text{O-CH}_2\text{-CH}_2\text{-CH}_2\text{-CH}_2\text{-Br}$ , Piperidine- $\text{CHH}$ ), 3.42-3.47 (4H, m,  $\text{OCH}_2$ ,  $\text{BrCH}_2$ ), 3.50-3.57 (1H, m, Piperidine- $\text{CH}$ ).

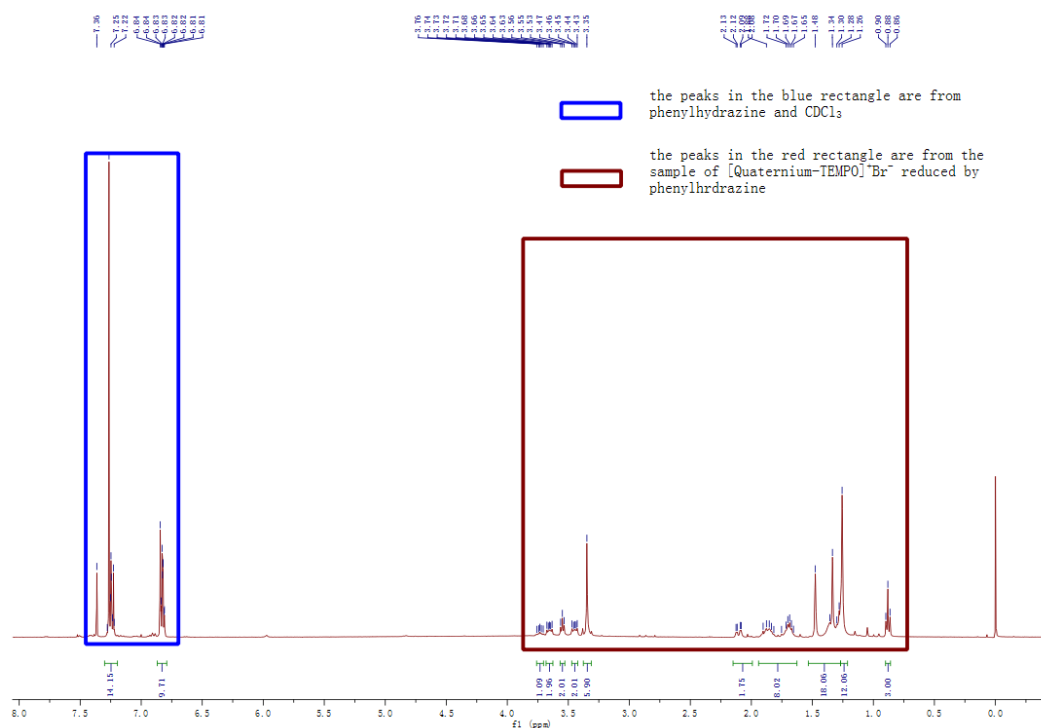

**Fig2.  $^1\text{H}$  NMR of the sample of  $[\text{Quaternium-TEMPO}]^+\text{Br}^-$  reduced by phenylhydrazine ( $\text{CDCl}_3$ )**

$^1\text{H}$  NMR (400 MHz;  $\text{CDCl}_3$ ;  $\text{Me}_4\text{Si}$ )  $\delta$ : 0.88 (3H, t,  $J = 6.8$  Hz, Me), 1.26 (12H, s, Piperidine-Me), 1.28-1.48 (18H, m,  $\text{N-CH}_2\text{-CH}_2\text{-(CH}_2\text{)}_9\text{-CH}_3$ ), 1.65-1.88 (8H, m, Piperidine- $\text{CH}_2$ ,  $\text{O-CH}_2\text{-CH}_2\text{-CH}_2\text{-CH}_2\text{-N}$ ,  $\text{N-CH}_2\text{-CH}_2\text{-C}_9\text{H}_{18}\text{-CH}_3$ ), 2.00-2.13 (2H, m,  $\text{O-CH}_2\text{-CH}_2\text{-CH}_2\text{-CH}_2\text{-N}$ ), 3.35 (6H, s, NMe), 3.43-3.47 (2H, m,  $\text{N-CH}_2\text{-CH}_2\text{-C}_9\text{H}_{18}\text{-CH}_3$ ), 3.55 (2H, t,  $J = 6$  Hz,  $\text{O-CH}_2\text{-CH}_2\text{-CH}_2\text{-CH}_2\text{-N}$ ), 3.63-3.68 (2H, m,  $\text{OCH}_2$ ), 3.71-3.76 (1H, m, Piperidine-CH).

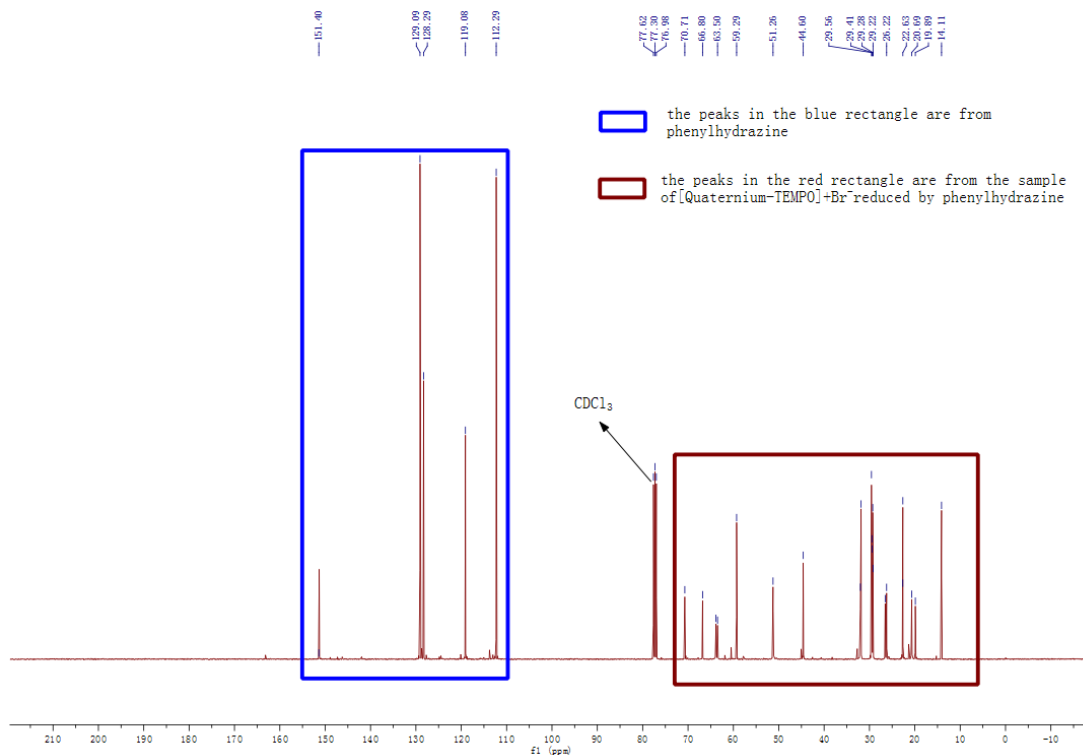

**Fig3. <sup>13</sup>C NMR of the sample of [Quaternium-TEMPO]<sup>+</sup>Br<sup>-</sup> reduced by phenylhydrazine (CDCl<sub>3</sub>)**

<sup>13</sup>C NMR (100MHz, CDCl<sub>3</sub>) δ: 14.11 (Me), 19.89 (O-CH<sub>2</sub>-CH<sub>2</sub>-CH<sub>2</sub>-CH<sub>2</sub>-N), 20.69 (N-CH<sub>2</sub>-CH<sub>2</sub>-C<sub>8</sub>H<sub>16</sub>-CH<sub>2</sub>-CH<sub>3</sub>), 22.64 (N-CH<sub>2</sub>-CH<sub>2</sub>-C<sub>9</sub>H<sub>18</sub>-CH<sub>3</sub>), 22.66 (N-CH<sub>2</sub>-CH<sub>2</sub>-CH<sub>2</sub>-C<sub>8</sub>H<sub>16</sub>-CH<sub>3</sub>), 26.22 (O-CH<sub>2</sub>-CH<sub>2</sub>-CH<sub>2</sub>-CH<sub>2</sub>-N), 26.54 (Piperidine-Me), 29.22, 29.28, 29.41, 29.46, 29.56, 31.85, 31.99 (N-CH<sub>2</sub>-CH<sub>2</sub>-CH<sub>2</sub>-(CH<sub>2</sub>)<sub>7</sub>-CH<sub>2</sub>-CH<sub>3</sub>), 44.60 (Piperidine-CH<sub>2</sub>), 51.26 (NMe), 59.29 (Piperidine-C), 63.50 (N-CH<sub>2</sub>-CH<sub>2</sub>-C<sub>9</sub>H<sub>18</sub>-CH<sub>3</sub>), 63.84 (O-CH<sub>2</sub>-CH<sub>2</sub>-CH<sub>2</sub>-CH<sub>2</sub>-N), 66.80 (Piperidine-CH), 70.71 (OCH<sub>2</sub>).

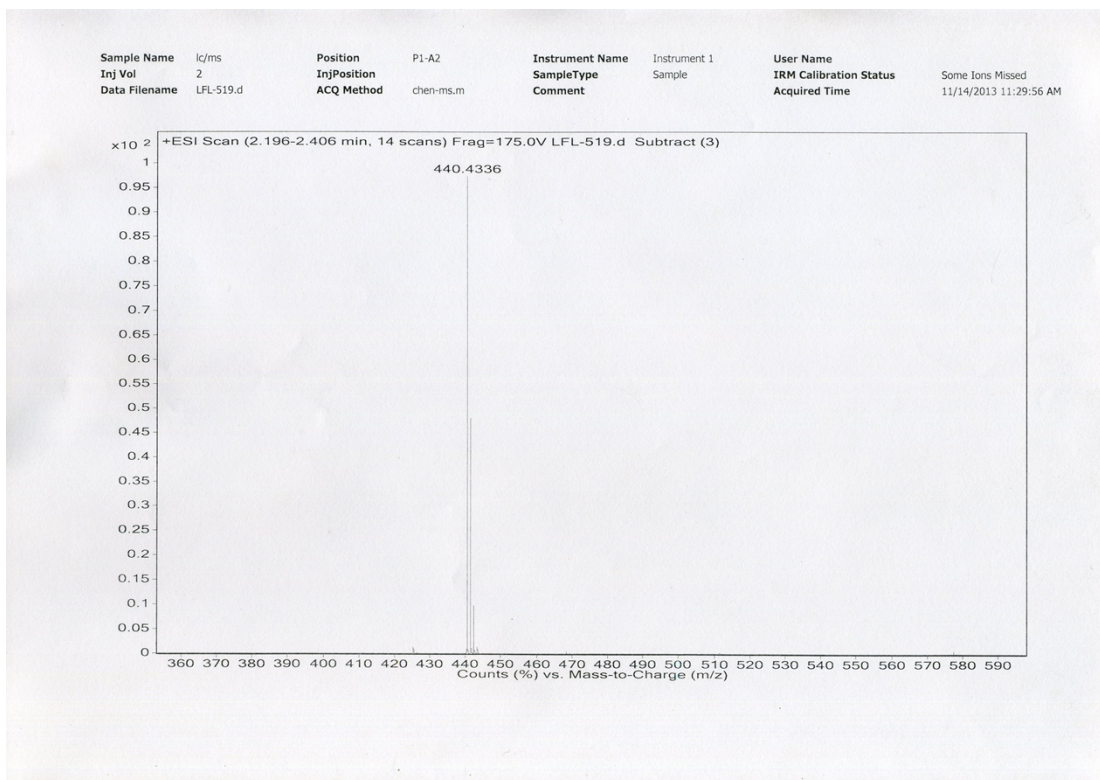

**Fig4. HR-MS (ESI) of [Quaternium-TEMPO]<sup>+</sup>**

HR-MS (ESI):  $m/z$  440.4336.  $C_{27}H_{56}N_2O_2$  calculated  $m/z$ : 440.4342.

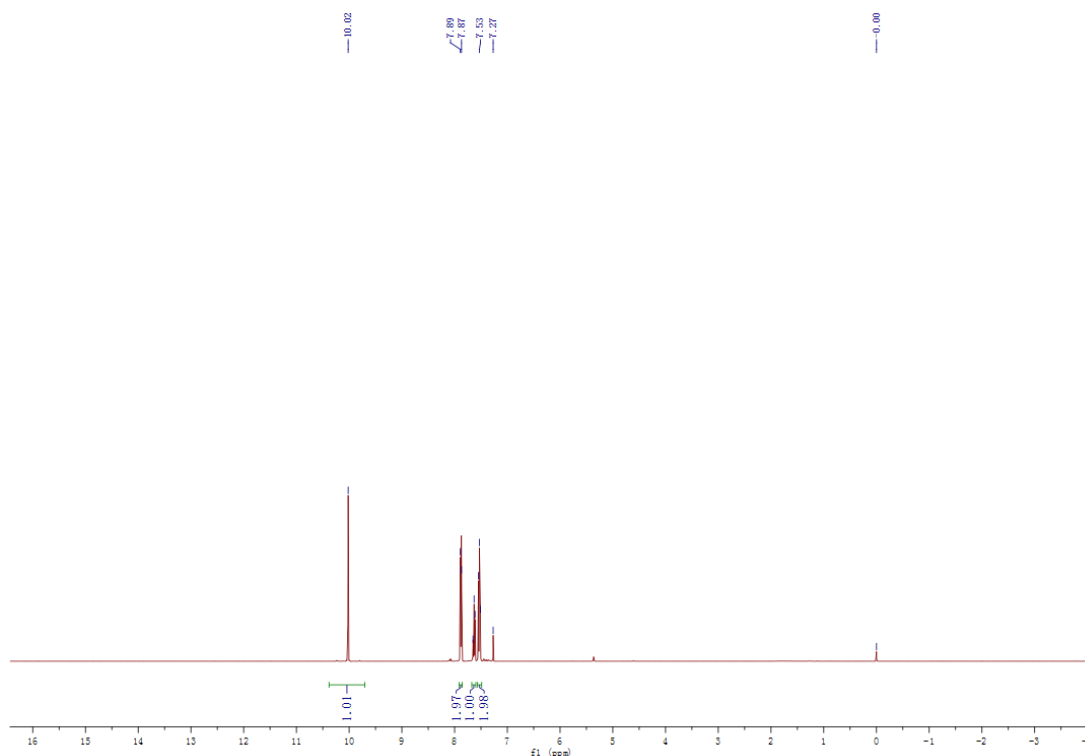

**Fig5. <sup>1</sup>H NMR of Benzaldehyde (entry 1) (CDCl<sub>3</sub>)**

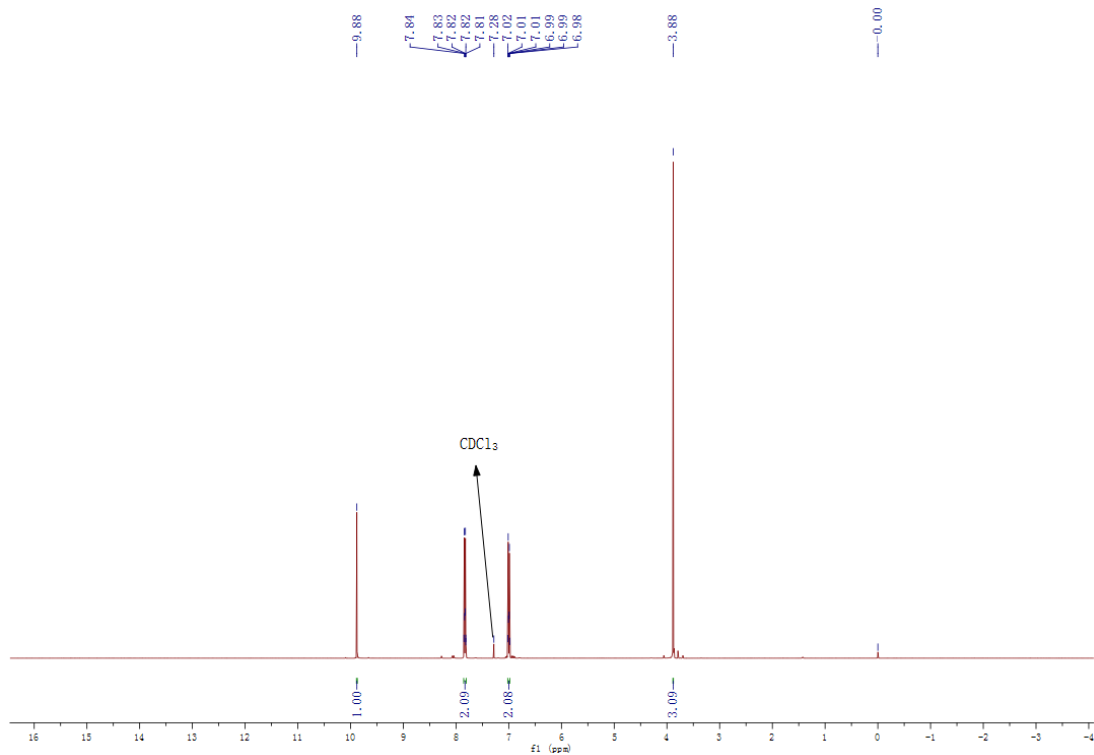

Fig6. <sup>1</sup>H NMR of 4-Methoxybenzaldehyde (entry 2) (CDCl<sub>3</sub>)

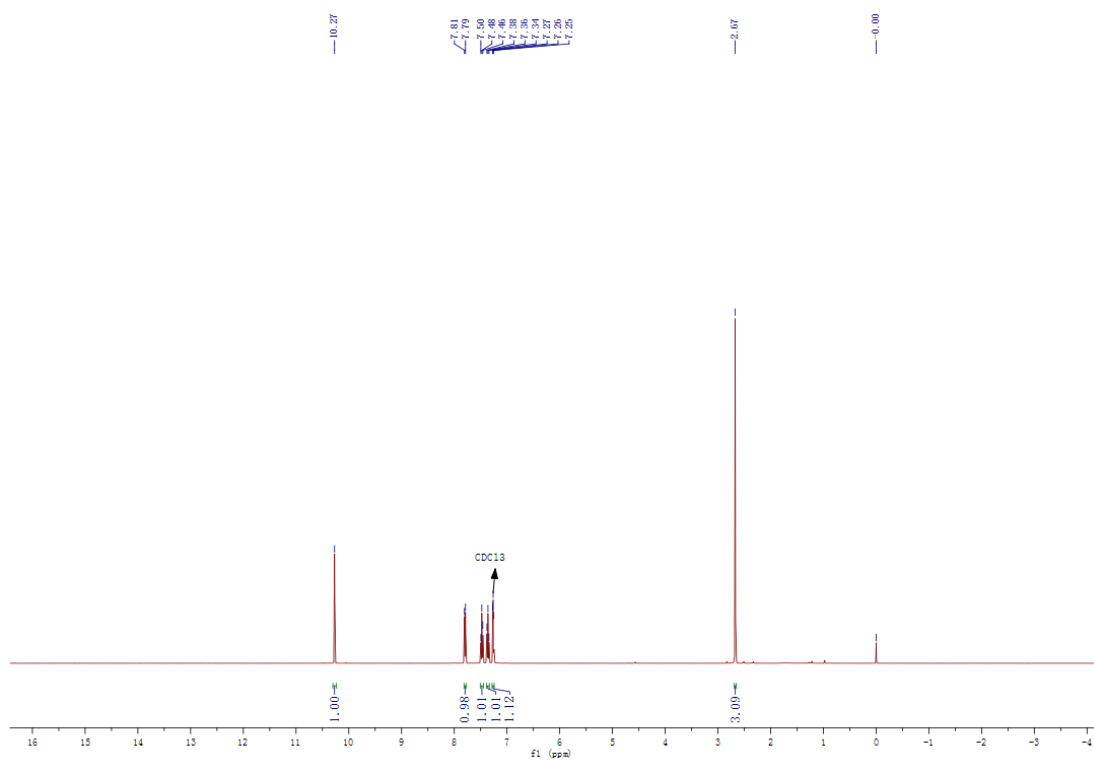

Fig7. <sup>1</sup>H NMR of 2-Methoxybenzaldehyde (entry 3) (CDCl<sub>3</sub>)

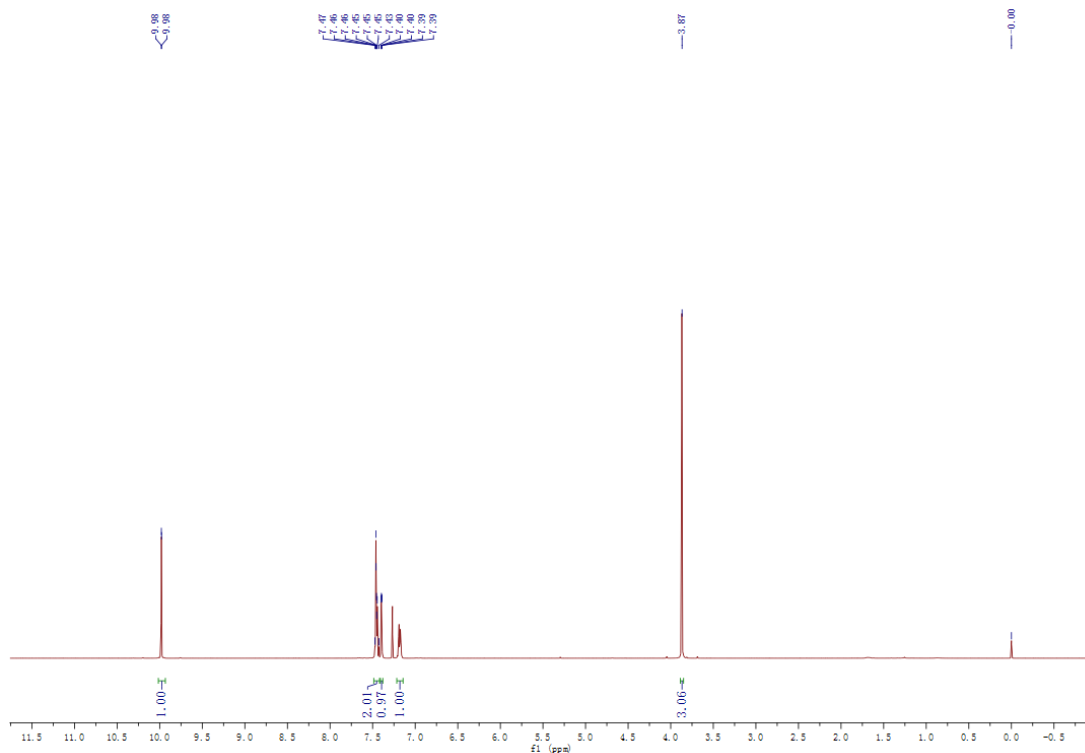

Fig8.  $^1\text{H}$  NMR of 3-Methoxybenzaldehyde (entry 4) ( $\text{CDCl}_3$ )

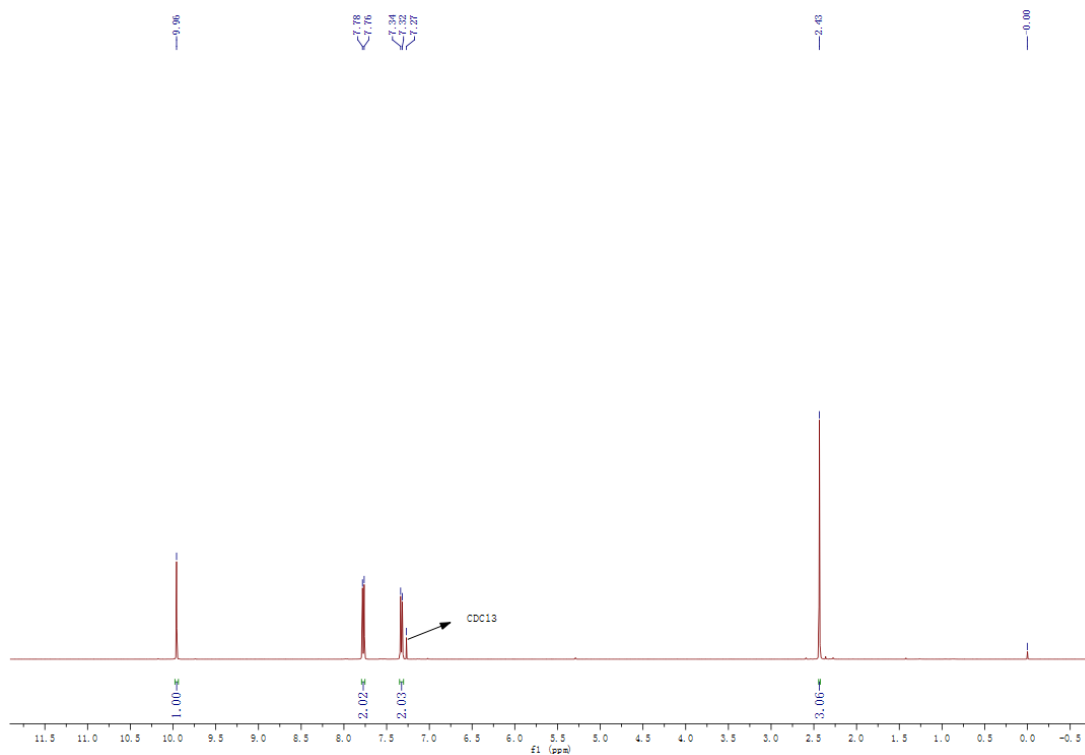

Fig9.  $^1\text{H}$  NMR of 4-Methylbenzaldehyde (entry 5) ( $\text{CDCl}_3$ )

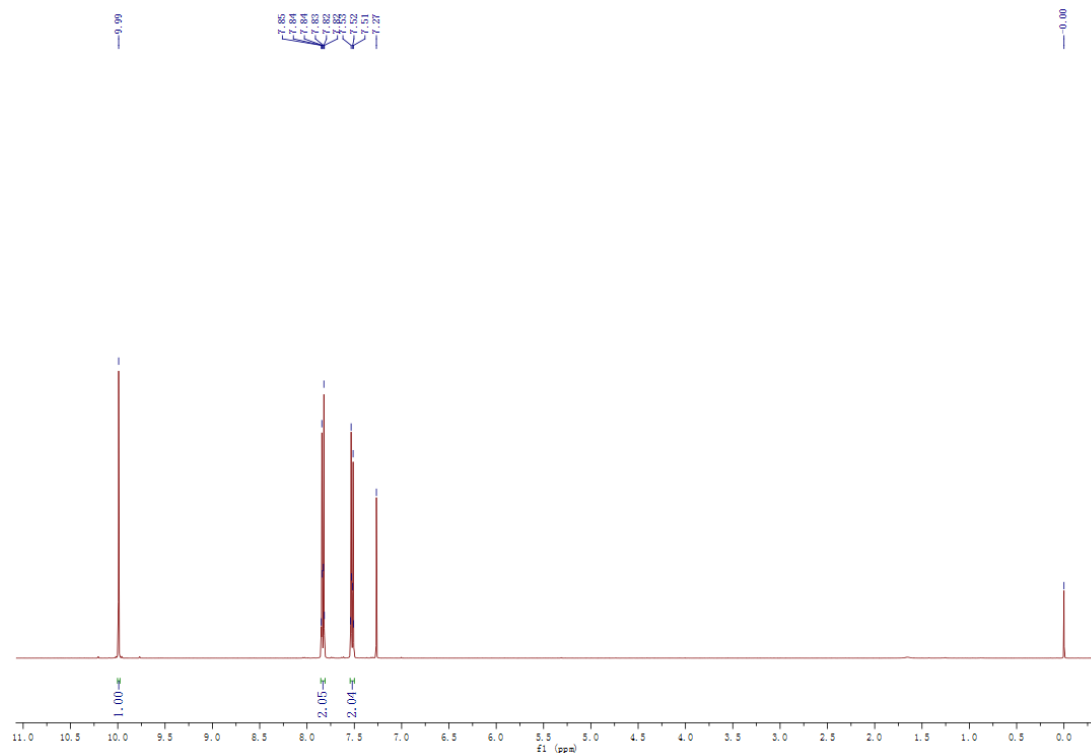

Fig10.  $^1\text{H}$  NMR of 4-Chlorobenzaldehyde (entry 6) ( $\text{CDCl}_3$ )

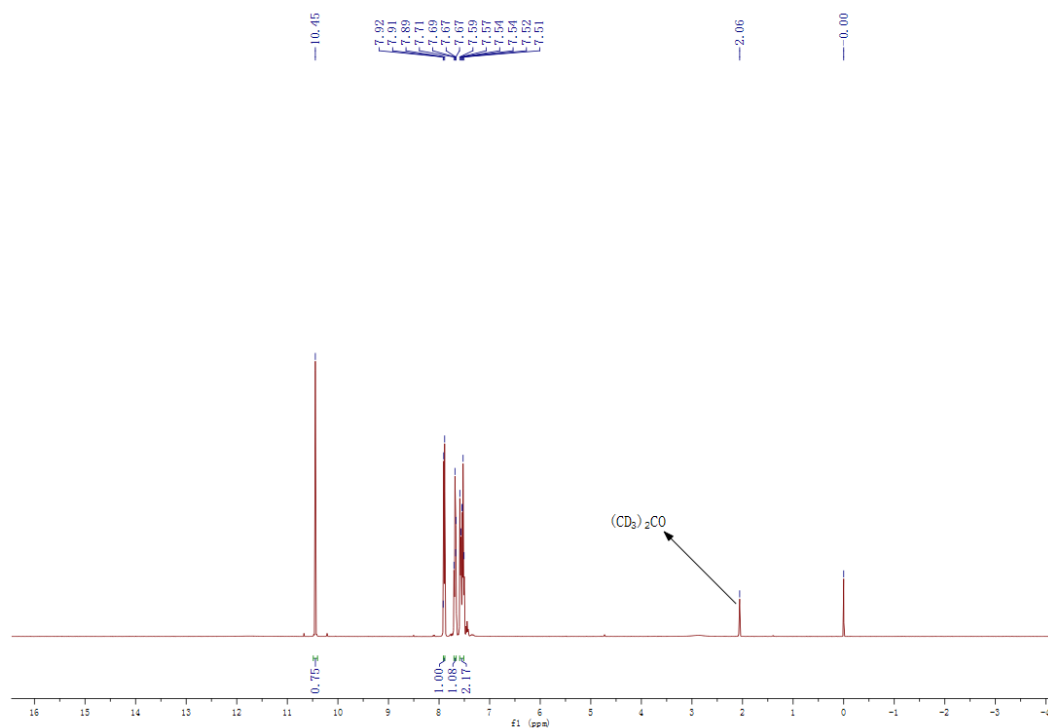

Fig11.  $^1\text{H}$  NMR of 2-Chlorobenzaldehyde (entry 7) ( $(\text{CD}_3)_2\text{CO}$ )



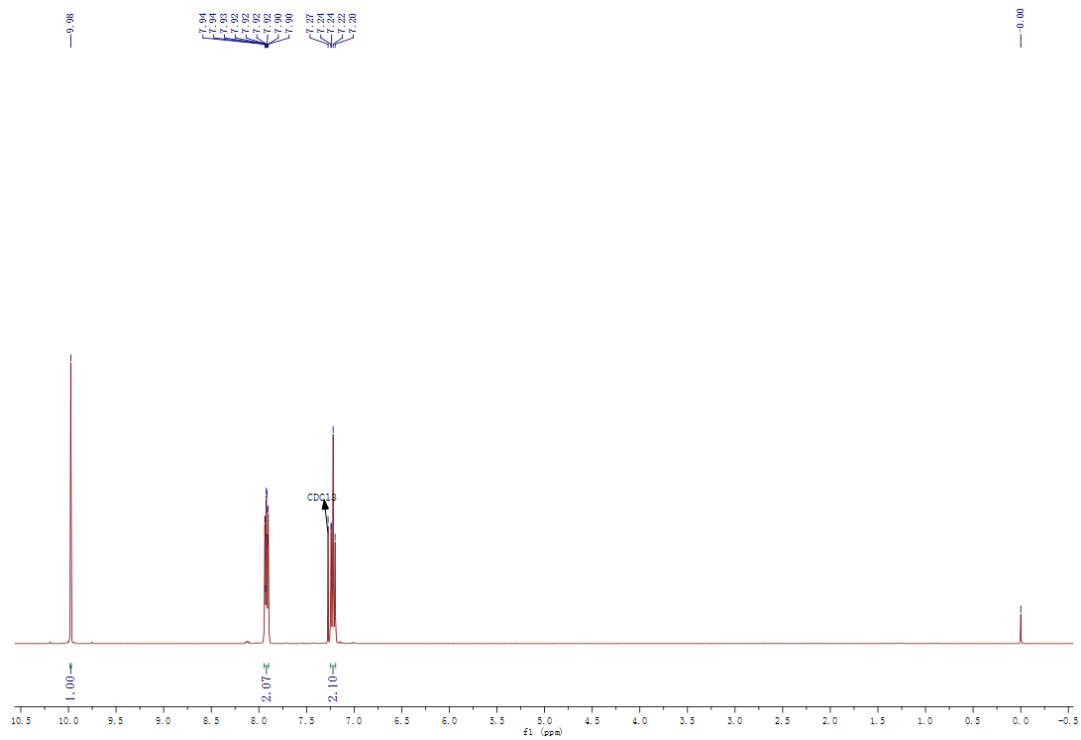

Fig12. <sup>1</sup>H NMR of 4-Fluorobenzaldehyde (entry 8) (CDCl<sub>3</sub>)

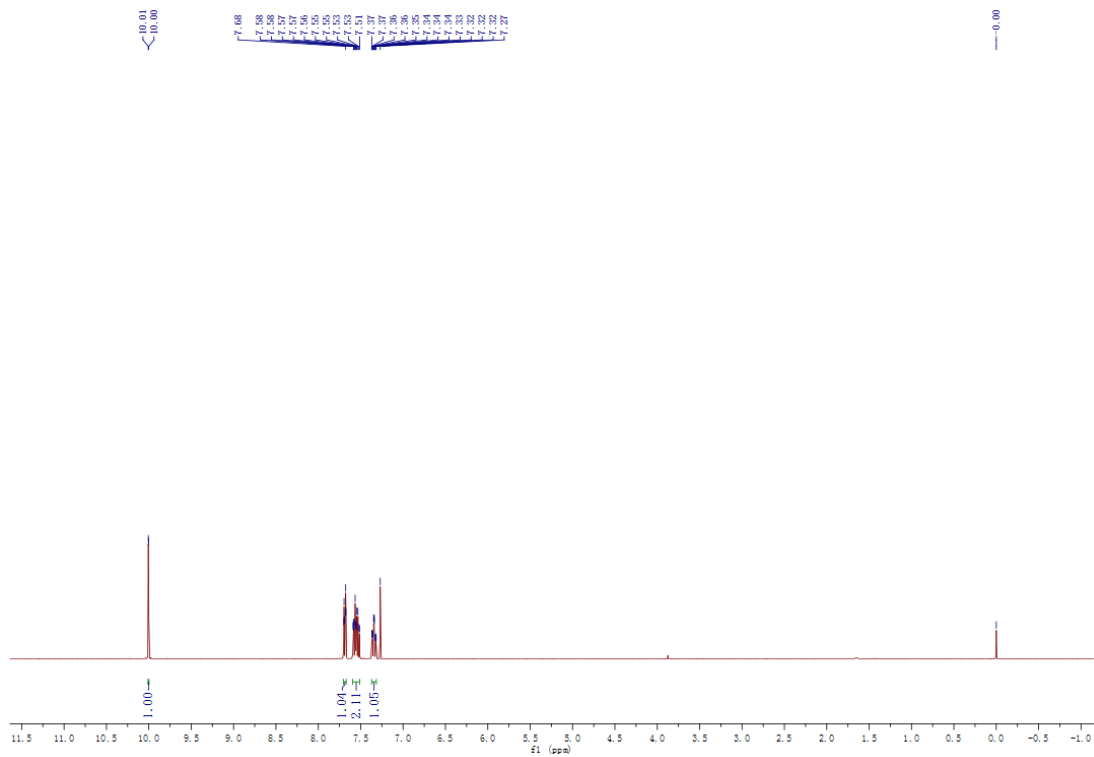

Fig13. <sup>1</sup>H NMR of 2-Fluorobenzaldehyde (entry 9) (CDCl<sub>3</sub>)

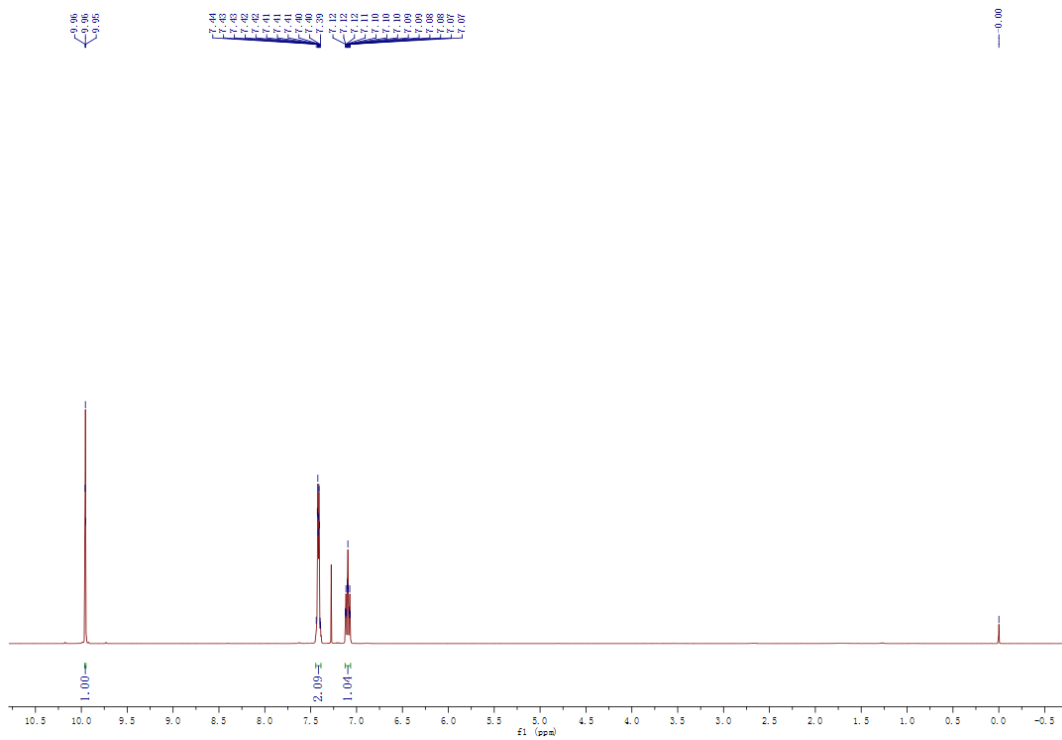

Fig14.  $^1\text{H}$  NMR of 3,5-Difluorobenzaldehyde (entry 10) ( $\text{CDCl}_3$ )

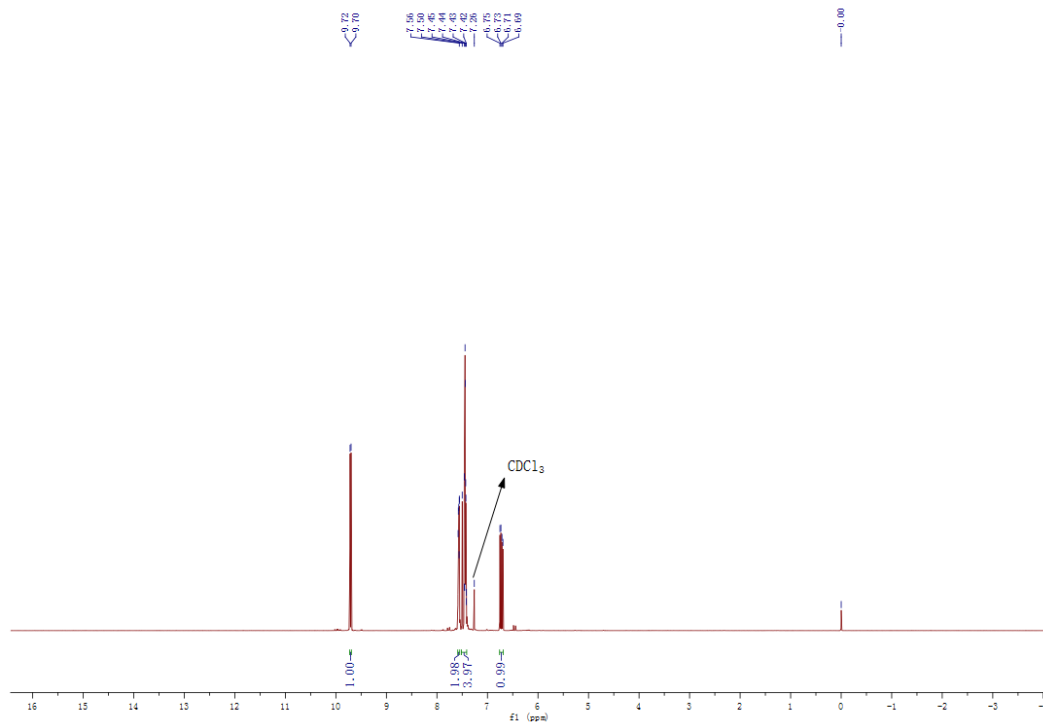

Fig15.  $^1\text{H}$  NMR of Cinnamaldehyde (entry 11) ( $\text{CDCl}_3$ )

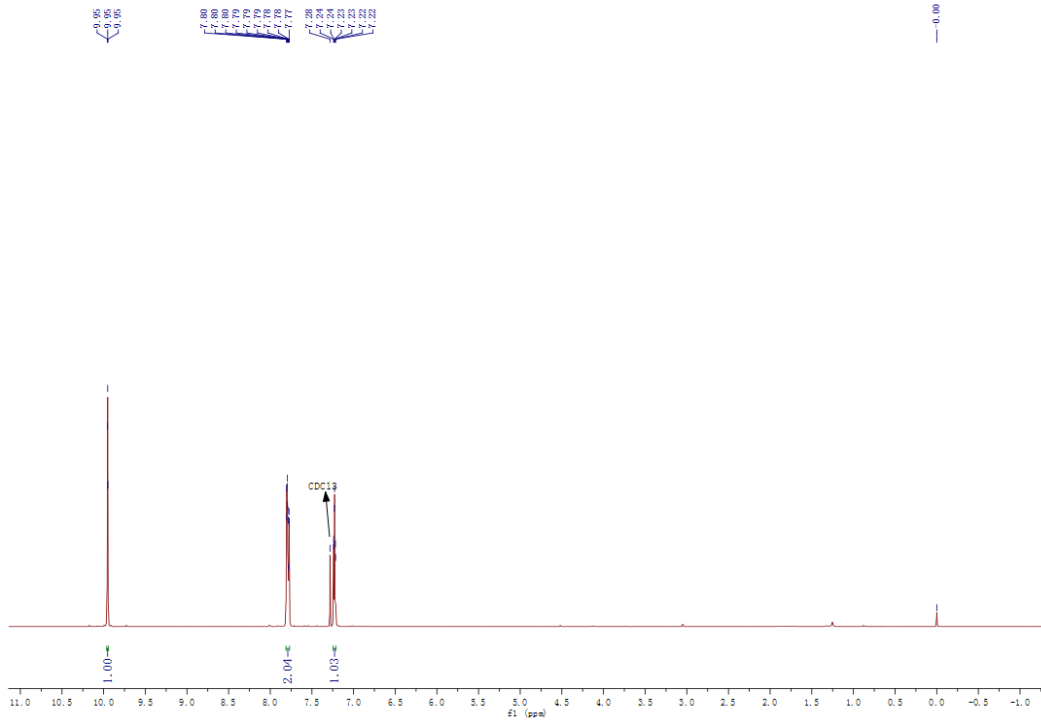

Fig16. <sup>1</sup>H NMR of 2-Thenaldehyde (entry 12) (CDCl<sub>3</sub>)

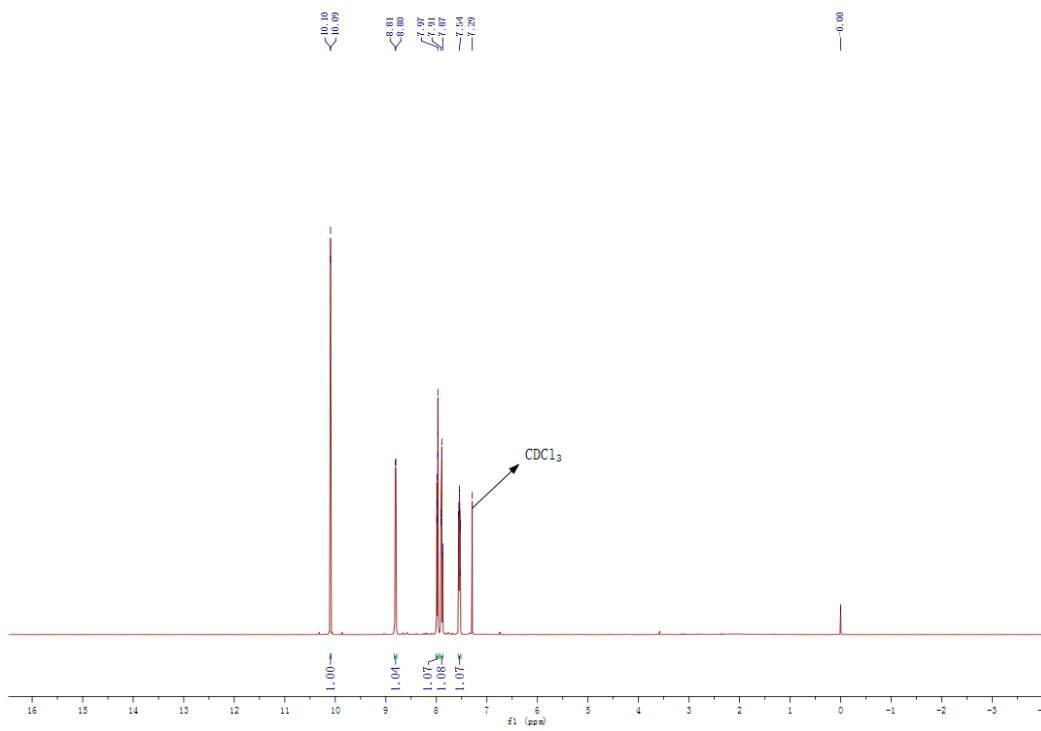

Fig17. <sup>1</sup>H NMR of 2-pyridinecarboxaldehyde (entry 13) (CDCl<sub>3</sub>)

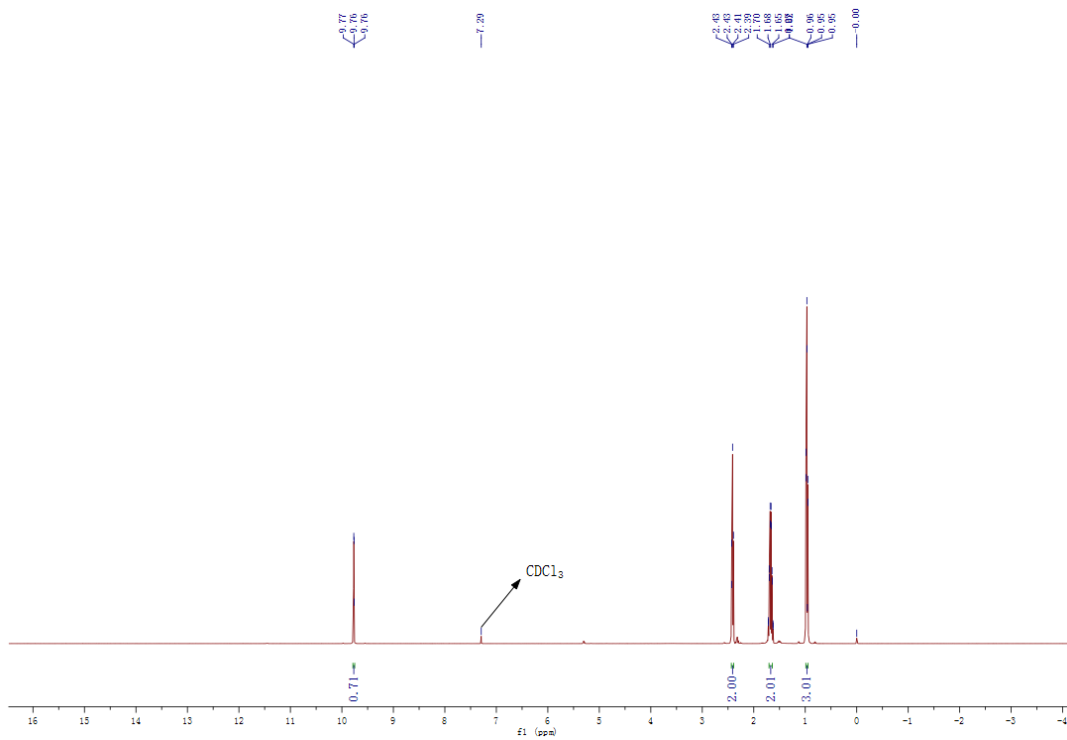

Fig18.  $^1\text{H}$  NMR of Butanal (entry 14) ( $\text{CDCl}_3$ )

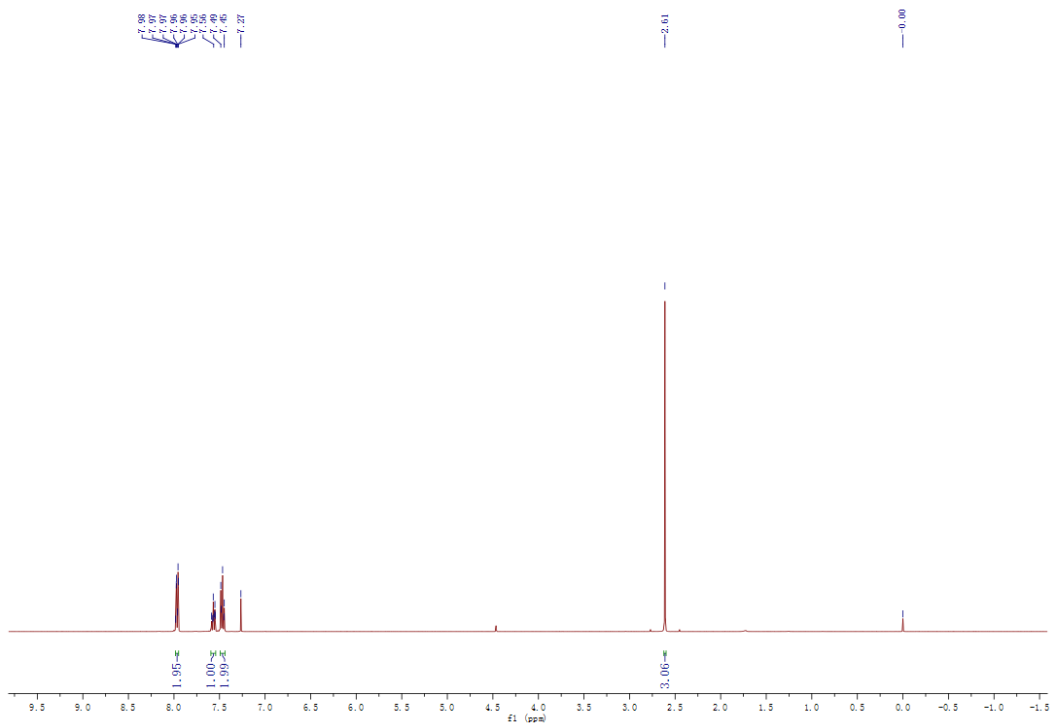

Fig19.  $^1\text{H}$  NMR of Acetophenone (entry 15) ( $\text{CDCl}_3$ )

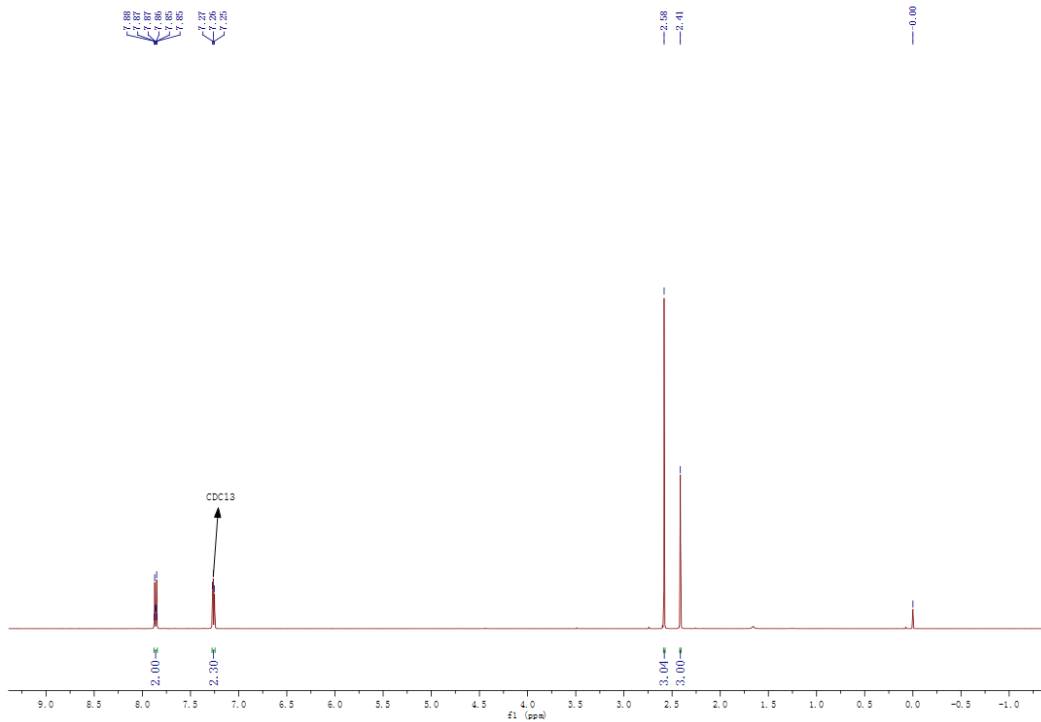

Fig20. <sup>1</sup>H NMR of 4-Methylacetophenone (entry 16) (CDCl<sub>3</sub>)

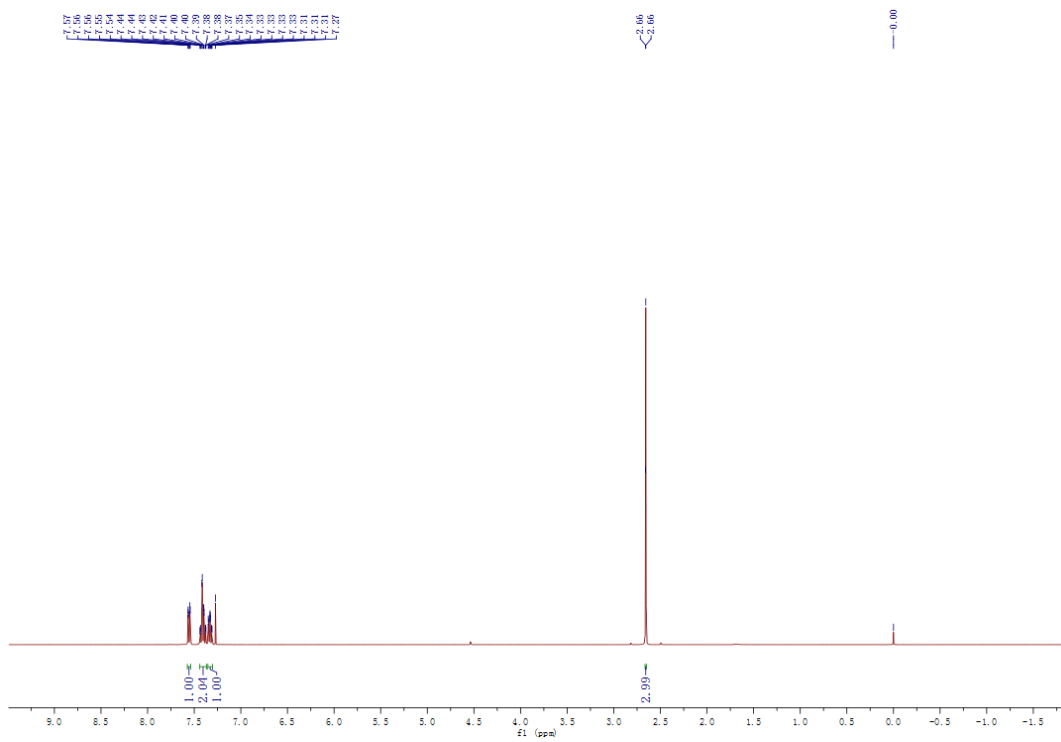

Fig21. <sup>1</sup>H NMR of 2-Chloroacetophenone (entry 17) (CDCl<sub>3</sub>)

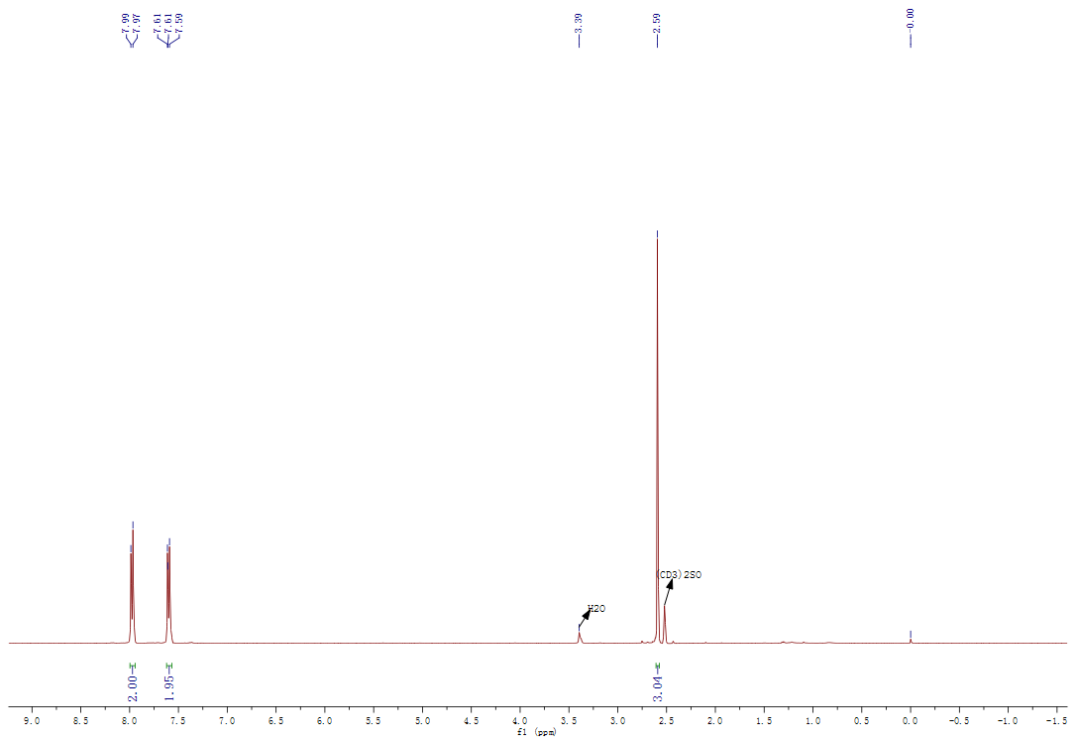

Fig22.  $^1H$  NMR of 4-Chloroacetophenone (entry 18) ( $(CD_3)_2SO$ )

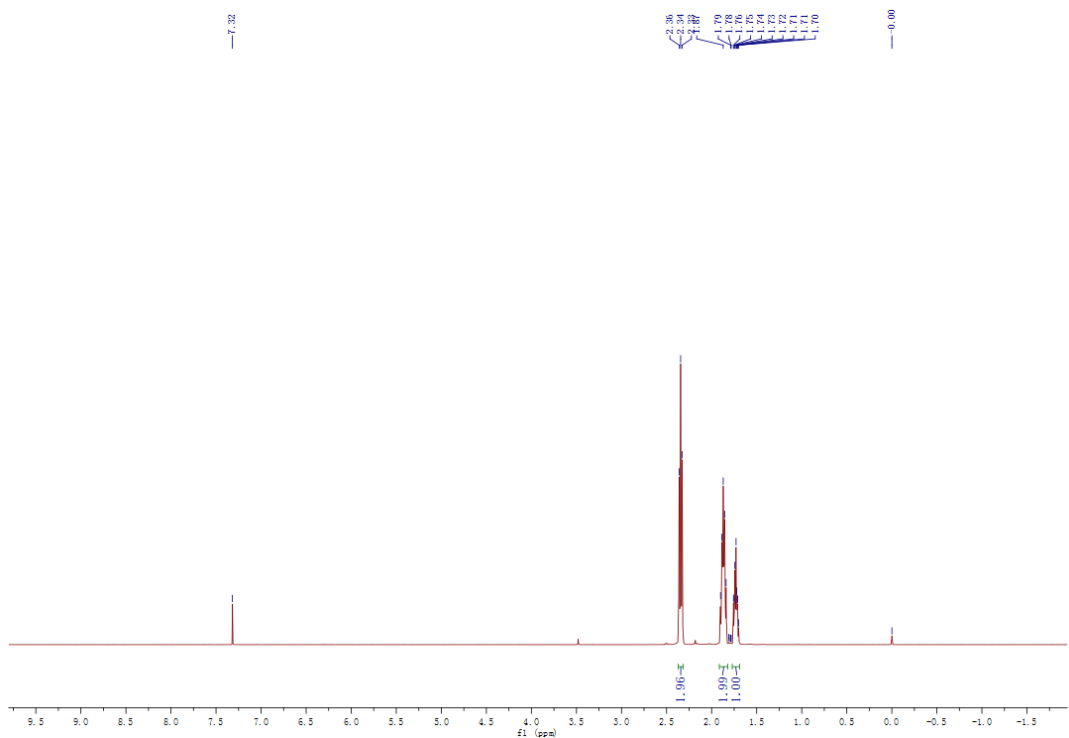

Fig23.  $^1H$  NMR of Cyclohexanone (entry 19) ( $CDCl_3$ )

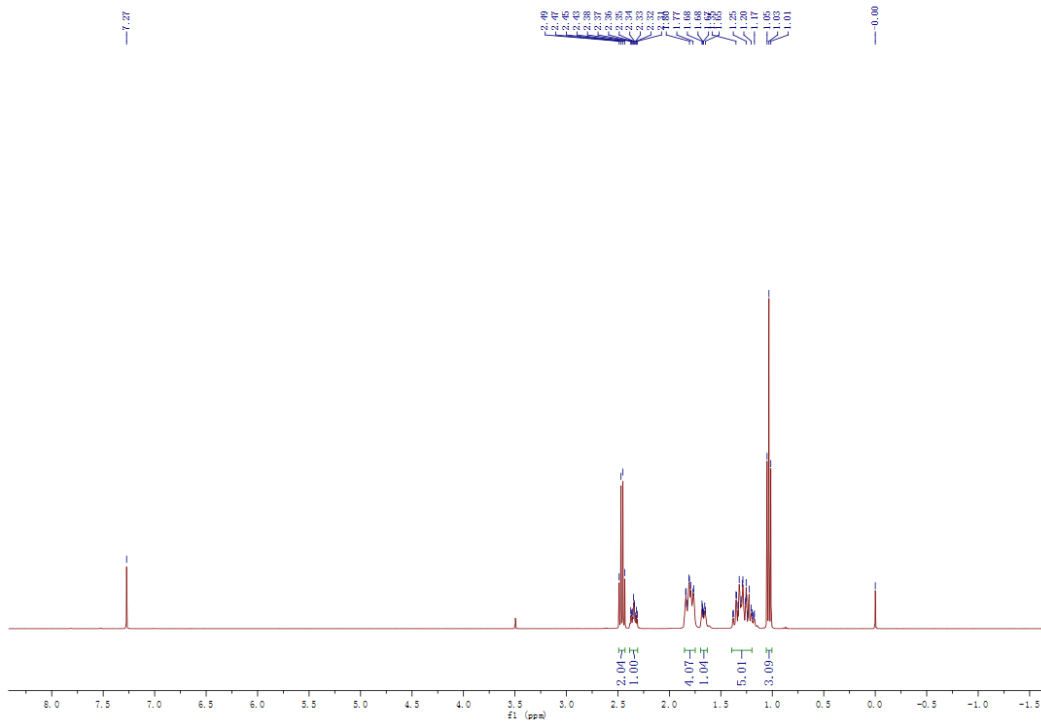

Fig24. <sup>1</sup>H NMR of 2-Octanone (entry 20) (CDCl<sub>3</sub>)

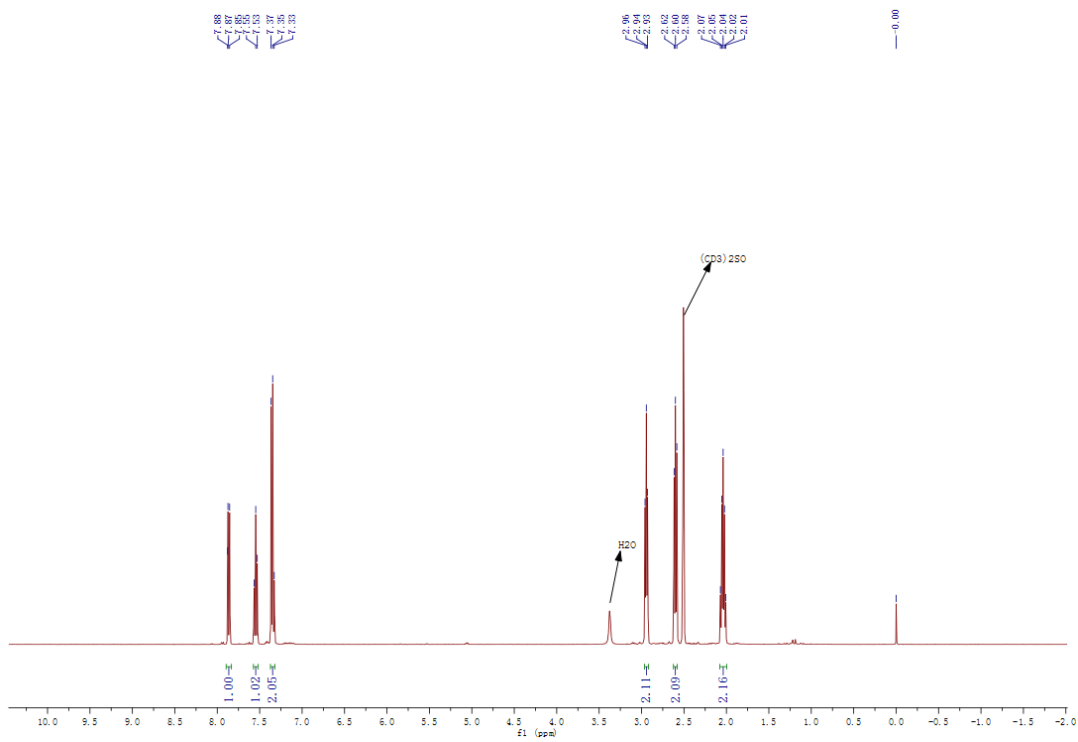

Fig25. <sup>1</sup>H NMR of 1,2,3,4-Tetrahydro-1-naphthalenone (entry 21) ( (CD<sub>3</sub>)<sub>2</sub>SO )

## Contents of GC analysis chromatograms

|                                                                                                             |    |
|-------------------------------------------------------------------------------------------------------------|----|
| Fig.1 GC chromatogram of Benzyl alcohol during the oxidation reaction (entry 1).....                        | 1  |
| Fig.2 GC chromatogram of Benzyl alcohol at the end of the oxidation reaction (entry 1) .....                | 1  |
| Fig.3 GC chromatogram of 4-Methoxybenzyl alcohol during the oxidation reaction (Entry 2)<br>.....           | 2  |
| Fig.4 GC chromatogram of 4-Methoxybenzyl alcohol at the end of the oxidation reaction<br>(entry 2).....     | 2  |
| Fig.5 GC chromatogram of 2-Methoxybenzyl alcohol during the oxidation reaction (entry 3)                    | 3  |
| Fig.6 GC chromatogram of 2-Methoxybenzyl alcohol at the end of the oxidation reaction<br>(entry 3).....     | 3  |
| Fig.7 GC chromatogram of 3-Methoxybenzyl alcohol during the oxidation reaction (entry 4)                    | 4  |
| Fig.8 GC chromatogram of 3-Methoxybenzyl alcohol at the end of the oxidation reaction<br>(entry 4).....     | 4  |
| Fig.9 GC chromatogram of 4-Methoxybenzyl alcohol during the oxidation reaction (entry 5)..                  | 5  |
| Fig.10 GC chromatogram of 4-Methoxybenzyl alcohol at the end of the oxidation reaction<br>(entry 5).....    | 5  |
| Fig.11 GC chromatogram of 4-Chlorobenzyl alcohol during the oxidation reaction (entry 6).                   | 6  |
| Fig.12 GC chromatogram of 4-Chlorobenzyl alcohol at the end of the oxidation reaction<br>(entry 6).....     | 6  |
| Fig.13 GC chromatogram of 2-Chlorobenzyl alcohol during the oxidation reaction (entry 7).                   | 7  |
| Fig.14 GC chromatogram of 2-Chlorobenzyl alcohol at the end of the oxidation reaction<br>(entry 7).....     | 7  |
| Fig.15 GC chromatogram of 4-Fluorobenzyl alcohol during the oxidation reaction (entry 8) .                  | 8  |
| Fig.16 GC chromatogram of 4-Fluorobenzyl alcohol at the end of the oxidation reaction<br>(entry 8).....     | 8  |
| Fig.17 GC chromatogram of 2-Fluorobenzyl alcohol during the oxidation reaction (entry 9) .                  | 9  |
| Fig.18 GC chromatogram of 2-Fluorobenzyl alcohol at the end of the oxidation reaction<br>(entry 9).....     | 9  |
| Fig.19 GC chromatogram of 3,5-Difluorobenzyl alcohol during the oxidation reaction (entry<br>10) .....      | 10 |
| Fig.20 GC chromatogram of 3,5-Difluorobenzyl alcohol at the end of the oxidation<br>reaction(entry 10)..... | 10 |
| Fig.21 GC chromatogram of Cinnamic alcohol during the oxidation reaction (entry 11) .....                   | 11 |
| Fig.22 GC chromatogram of Cinnamic alcohol at the end of the oxidation reaction (entry 11)<br>.....         | 11 |
| Fig.23 GC chromatogram of 2-Thienylmethyl alcohol during the oxidation reaction (entry 12)<br>.....         | 12 |
| Fig.24 GC chromatogram of 2-Thienylmethyl alcohol at the end of the oxidation reaction<br>(entry 12).....   | 12 |
| Fig.25 GC chromatogram of 2-Pyridinemethanol during the oxidation reaction (entry 13) ...                   | 13 |
| Fig.26 GC chromatogram of 2-Pyridinemethanol at the end of the oxidation reaction (entry<br>13) .....       | 13 |
| Fig.27 GC chromatogram of Butyl alcohol during the oxidation reaction (entry 14) .....                      | 14 |



|                                                                                                                  |    |
|------------------------------------------------------------------------------------------------------------------|----|
| Fig.28 GC chromatogram of Butyl alcohol at the end of the oxidation reaction (entry 14)....                      | 14 |
| Fig.29 GC chromatogram of 1-Phenyl ethanol during the oxidation reaction (entry 15).....                         | 15 |
| Fig.30 GC chromatogram of 1-Phenyl ethanol at the end of the oxidation reaction (entry 15)<br>.....              | 15 |
| Fig.31 GC chromatogram of 1-(4-Methylphenyl) ethanol during the oxidation reaction (entry<br>16).....            | 16 |
| Fig.32 GC chromatogram of 1-(4-Methylphenyl) ethanol at the end of the oxidation reaction<br>(entry 16).....     | 16 |
| Fig.33 GC chromatogram of 1-(2-Chlorobenzyl) ethanol during the oxidation reaction (entry<br>17).....            | 17 |
| Fig.34 GC chromatogram of 1-(2-Chlorobenzyl) ethanol at the end of the oxidation reaction<br>(entry 17).....     | 17 |
| Fig.35 GC chromatogram of 1-(4-Chlorobenzyl) ethanol during the oxidation reaction (entry<br>18).....            | 18 |
| Fig.36 GC chromatogram of 1-(4-Chlorobenzyl) ethanol at the end of the oxidation reaction<br>(entry 18).....     | 18 |
| Fig.37 GC chromatogram of Cyclohexanol during the oxidation reaction (entry 19).....                             | 19 |
| Fig.38 GC chromatogram of Cyclohexanol at the end of the oxidation reaction (entry 19) ...                       | 19 |
| Fig.39 GC chromatogram of 2-Octanol during the oxidation reaction (entry 20).....                                | 20 |
| Fig.40 GC chromatogram of 2-Octanol at the end of the oxidation reaction (entry 20) .....                        | 20 |
| Fig.41 GC chromatogram of 1,2,3,4-Tetrahydro-1-naphthol during the oxidation reaction<br>(entry 21).....         | 21 |
| Fig.42 GC chromatogram of 1,2,3,4-Tetrahydro-1-naphthol at the end of the oxidation<br>reaction (entry 21 )..... | 21 |

Attention: The first peak in the GC chromatograms below is from the diluent (acetonitrile) in the analysis.

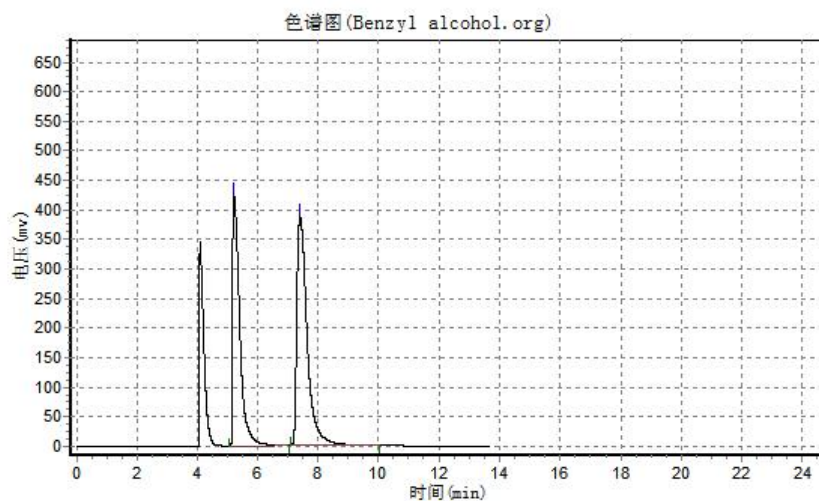

**分析结果表**

| 峰号 | 峰名 | 保留时间  | 峰高         | 峰面积          | 含量       |
|----|----|-------|------------|--------------|----------|
| 1  |    | 5.215 | 424895.906 | 7031087.500  | 43.0456  |
| 2  |    | 7.407 | 387427.656 | 9302973.000  | 56.9544  |
| 总计 |    |       | 812323.563 | 16334060.500 | 100.0000 |

**Fig.1 GC chromatogram of Benzyl alcohol during the oxidation reaction (entry 1)**

Column temperature 190 °C, pressure of the carrier gas 0.07Mpa.

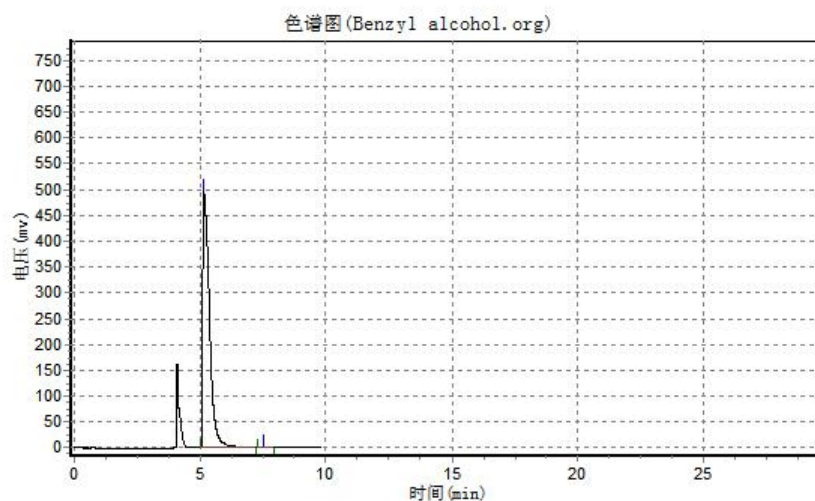

**分析结果表**

| 峰号 | 峰名 | 保留时间  | 峰高         | 峰面积         | 含量       |
|----|----|-------|------------|-------------|----------|
| 1  |    | 5.148 | 497150.031 | 9121717.000 | 99.8705  |
| 2  |    | 7.540 | 684.766    | 11827.200   | 0.1295   |
| 总计 |    |       | 497834.797 | 9133544.200 | 100.0000 |

**Fig.2 GC chromatogram of Benzyl alcohol at the end of the oxidation reaction (entry 1)**

Column temperature 190 °C, pressure of the carrier gas 0.07Mpa.

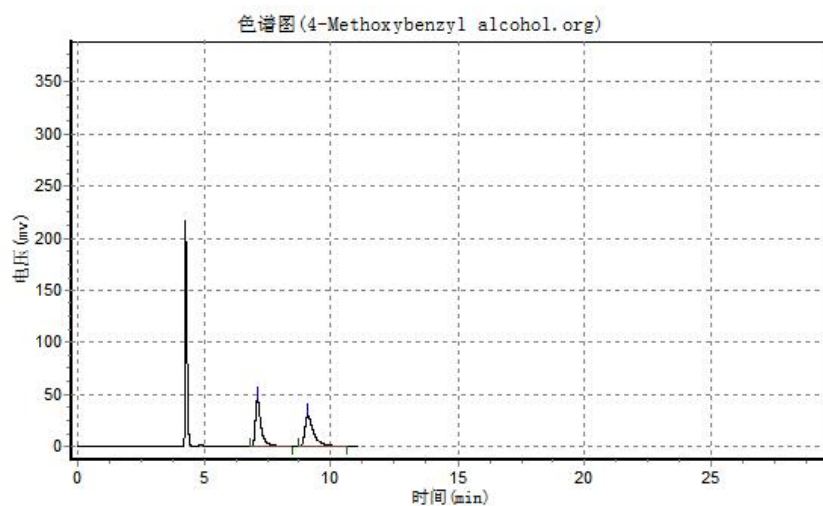

分析结果表

| 峰号 | 峰名 | 保留时间  | 峰高        | 峰面积         | 含量       |
|----|----|-------|-----------|-------------|----------|
| 1  |    | 7.098 | 45883.430 | 743076.813  | 49.7487  |
| 2  |    | 9.107 | 29796.615 | 750582.375  | 50.2512  |
| 总计 |    |       | 75680.045 | 1493659.188 | 100.0000 |

Fig.3 GC chromatogram of 4-Methoxybenzyl alcohol during the oxidation reaction (Entry 2)

Column temperature 220 °C, pressure of the carrier gas 0.07Mpa.

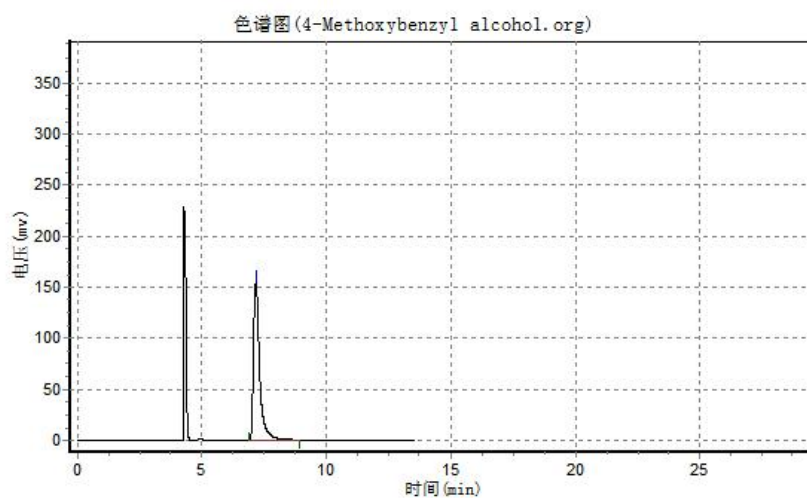

分析结果表

| 峰号 | 峰名 | 保留时间  | 峰高         | 峰面积         | 含量       |
|----|----|-------|------------|-------------|----------|
| 1  |    | 7.182 | 153652.500 | 2691614.500 | 100.0000 |
| 总计 |    |       | 153652.500 | 2691614.500 | 100.0000 |

Fig.4 GC chromatogram of 4-Methoxybenzyl alcohol at the end of the oxidation reaction (entry 2)

Column temperature 220 °C, pressure of the carrier gas 0.07Mpa.

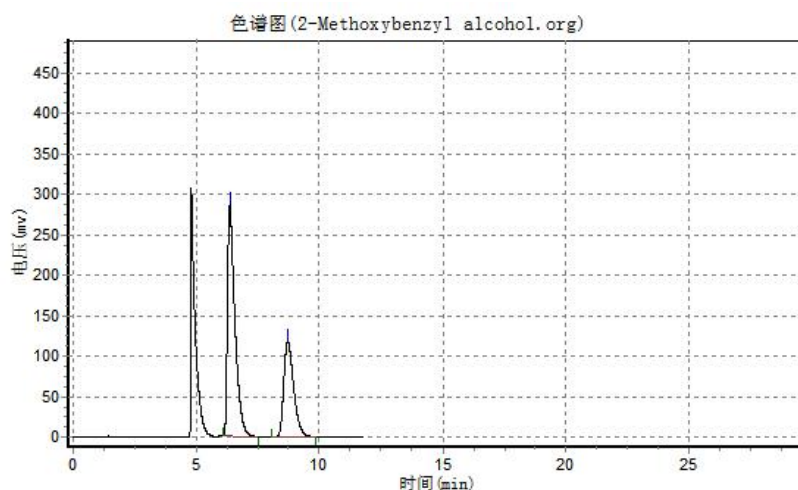

**分析结果表**

| 峰号 | 峰名 | 保留时间  | 峰高         | 峰面积         | 含量       |
|----|----|-------|------------|-------------|----------|
| 1  |    | 6.368 | 285799.750 | 6000752.500 | 64.4420  |
| 2  |    | 8.712 | 118893.313 | 3311117.750 | 35.5580  |
| 总计 |    |       | 404693.063 | 9311870.250 | 100.0000 |

**Fig.5 GC chromatogram of 2-Methoxybenzyl alcohol during the oxidation reaction (entry 3)**  
 Column temperature 220 °C, pressure of the carrier gas 0.05Mpa.

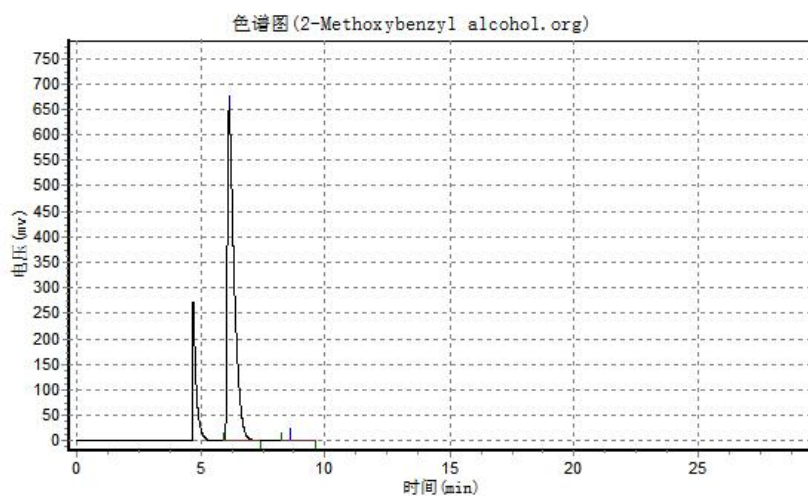

**分析结果表**

| 峰号 | 峰名 | 保留时间  | 峰高         | 峰面积          | 含量       |
|----|----|-------|------------|--------------|----------|
| 1  |    | 6.123 | 650438.188 | 12372660.000 | 99.8666  |
| 2  |    | 8.565 | 460.000    | 16533.102    | 0.1334   |
| 总计 |    |       | 650898.188 | 12389193.102 | 100.0000 |

**Fig.6 GC chromatogram of 2-Methoxybenzyl alcohol at the end of the oxidation reaction (entry 3)**  
 Column temperature 220 °C, pressure of the carrier gas 0.05Mpa.

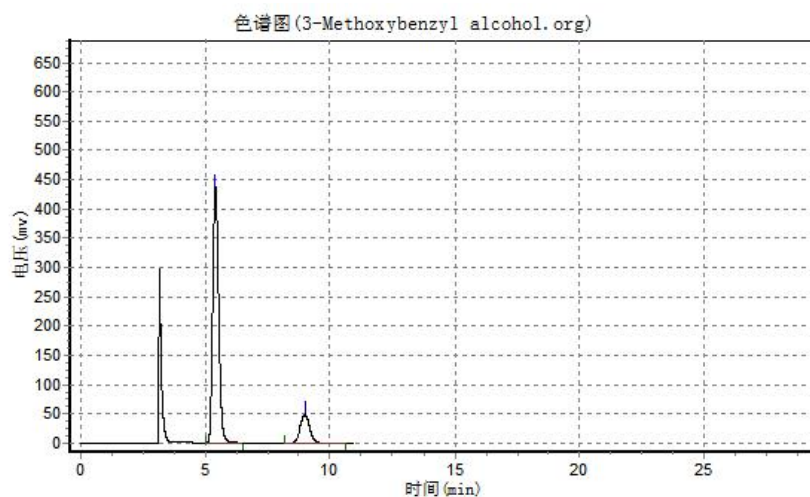

**分析结果表**

| 峰号 | 峰名 | 保留时间  | 峰高         | 峰面积         | 含量       |
|----|----|-------|------------|-------------|----------|
| 1  |    | 5.410 | 437453.719 | 7247124.500 | 84.5164  |
| 2  |    | 9.022 | 49470.352  | 1327685.875 | 15.4836  |
| 总计 |    |       | 486924.070 | 8574810.375 | 100.0000 |

**Fig.7 GC chromatogram of 3-Methoxybenzyl alcohol during the oxidation reaction (entry 4)**  
 Column temperature 220 °C, pressure of the carrier gas 0.07Mpa.

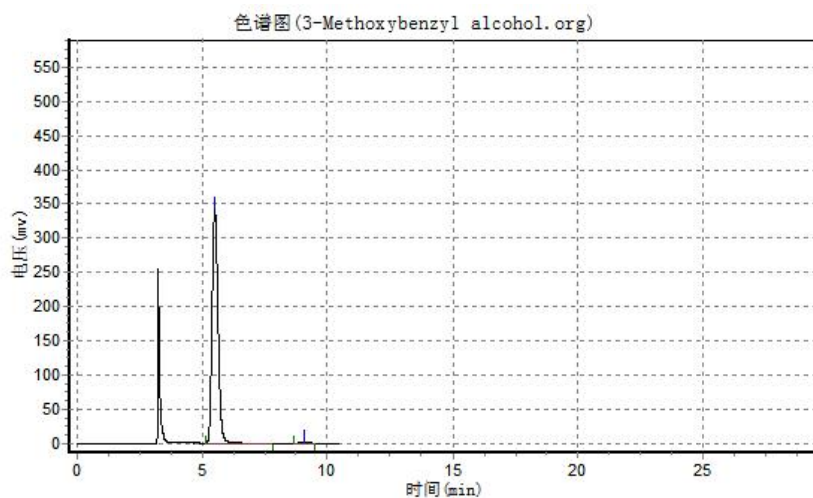

**分析结果表**

| 峰号 | 峰名 | 保留时间  | 峰高         | 峰面积         | 含量       |
|----|----|-------|------------|-------------|----------|
| 1  |    | 5.487 | 342089.500 | 5665389.000 | 99.1494  |
| 2  |    | 9.065 | 1925.250   | 48600.996   | 0.8506   |
| 总计 |    |       | 344014.750 | 5713989.996 | 100.0000 |

**Fig.8 GC chromatogram of 3-Methoxybenzyl alcohol at the end of the oxidation reaction (entry 4)**  
 Column temperature 220 °C, pressure of the carrier gas 0.07Mpa.

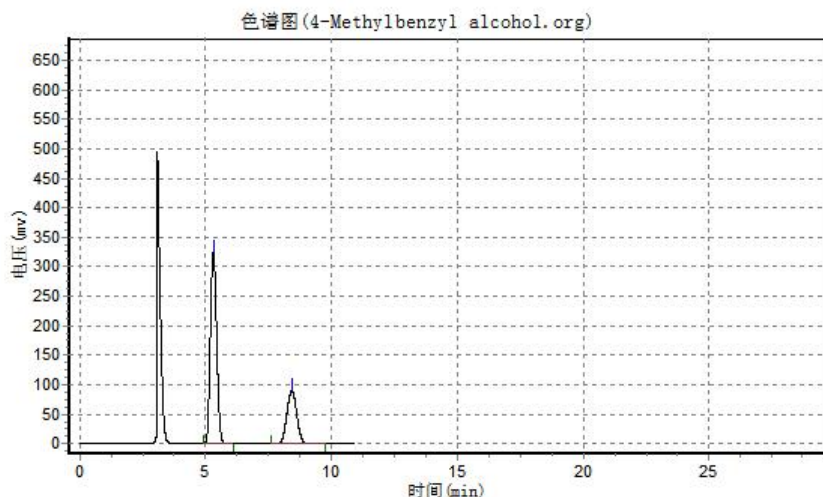

分析结果表

| 峰号 | 峰名 | 保留时间  | 峰高         | 峰面积         | 含量       |
|----|----|-------|------------|-------------|----------|
| 1  |    | 5.330 | 323592.219 | 5711378.000 | 70.0048  |
| 2  |    | 8.455 | 89658.828  | 2447175.500 | 29.9952  |
| 总计 |    |       | 413251.047 | 8158553.500 | 100.0000 |

Fig.9 GC chromatogram of 4-Methxybenzyl alcohol during the oxidation reaction (entry 5)

Column temperature 190 °C, pressure of the carrier gas 0.07Mpa.

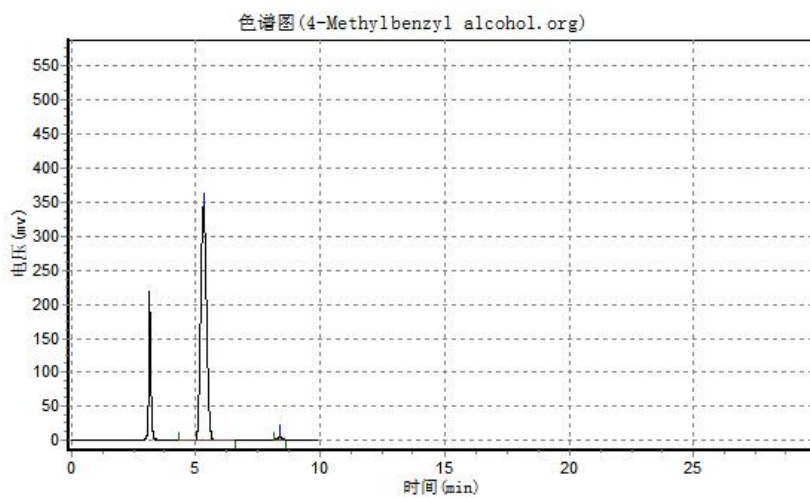

分析结果表

| 峰号 | 峰名 | 保留时间  | 峰高         | 峰面积         | 含量       |
|----|----|-------|------------|-------------|----------|
| 1  |    | 5.325 | 345426.250 | 5669639.000 | 99.1649  |
| 2  |    | 8.392 | 2729.000   | 47744.199   | 0.8351   |
| 总计 |    |       | 348155.250 | 5717383.199 | 100.0000 |

Fig.10 GC chromatogram of 4-Methoxybenzyl alcohol at the end of the oxidation reaction (entry 5)

Column temperature 190 °C, pressure of the carrier gas 0.07Mpa.

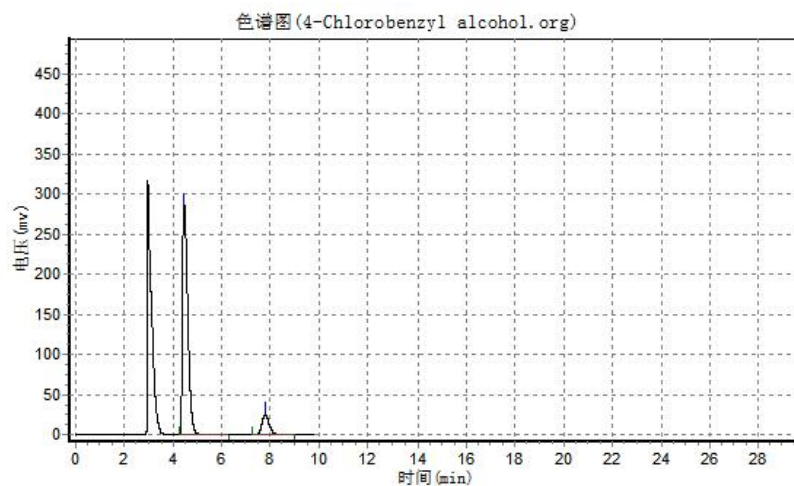

**分析结果表**

| 峰号 | 峰名 | 保留时间  | 峰高         | 峰面积         | 含量       |
|----|----|-------|------------|-------------|----------|
| 1  |    | 4.465 | 285031.438 | 4358265.500 | 89.6072  |
| 2  |    | 7.790 | 25109.770  | 505480.094  | 10.3928  |
| 总计 |    |       | 310141.207 | 4863745.594 | 100.0000 |

**Fig.11 GC chromatogram of 4-Chlorobenzyl alcohol during the oxidation reaction (entry 6)**

Column temperature 200 °C, pressure of the carrier gas 0.07Mpa.

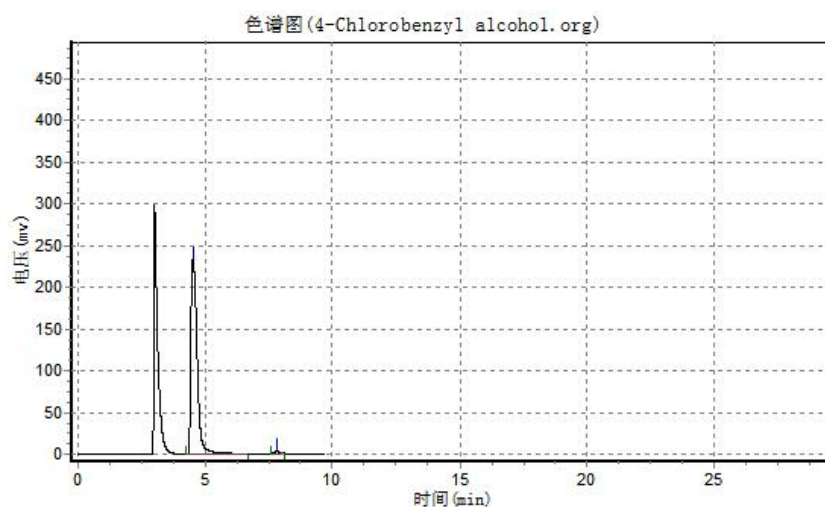

**分析结果表**

| 峰号 | 峰名 | 保留时间  | 峰高         | 峰面积         | 含量       |
|----|----|-------|------------|-------------|----------|
| 1  |    | 4.508 | 233071.375 | 3999809.000 | 99.0888  |
| 2  |    | 7.810 | 2071.781   | 36781.699   | 0.9112   |
| 总计 |    |       | 235143.156 | 4036590.699 | 100.0000 |

**Fig.12 GC chromatogram of 4-Chlorobenzyl alcohol at the end of the oxidation reaction (entry 6)**

Column temperature 200 °C, pressure of the carrier gas 0.07Mpa.

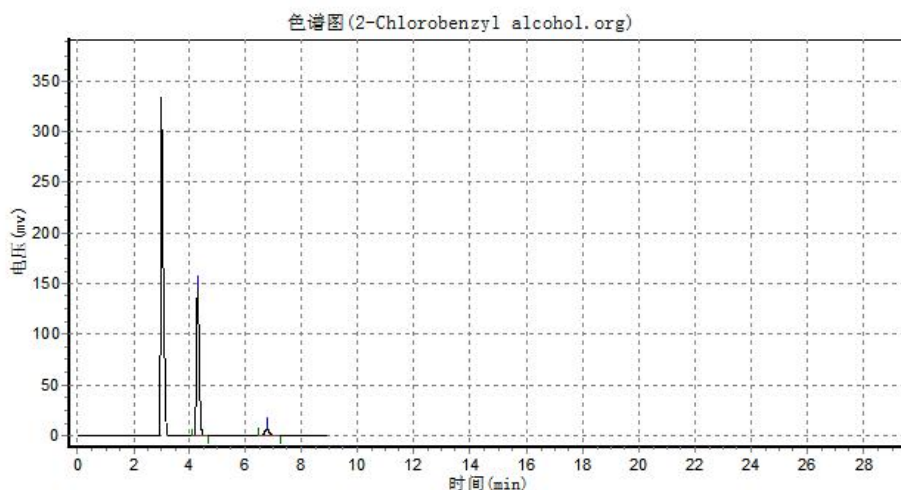

**分析结果表**

| 峰号 | 峰名 | 保留时间  | 峰高         | 峰面积         | 含量       |
|----|----|-------|------------|-------------|----------|
| 1  |    | 4.282 | 145484.469 | 1007665.188 | 92.3382  |
| 2  |    | 6.757 | 6836.340   | 83611.297   | 7.6618   |
| 总计 |    |       | 152320.809 | 1091276.484 | 100.0000 |

**Fig.13 GC chromatogram of 2-Chlorobenzyl alcohol during the oxidation reaction (entry 7)**

Column temperature 200 °C, pressure of the carrier gas 0.07Mpa.

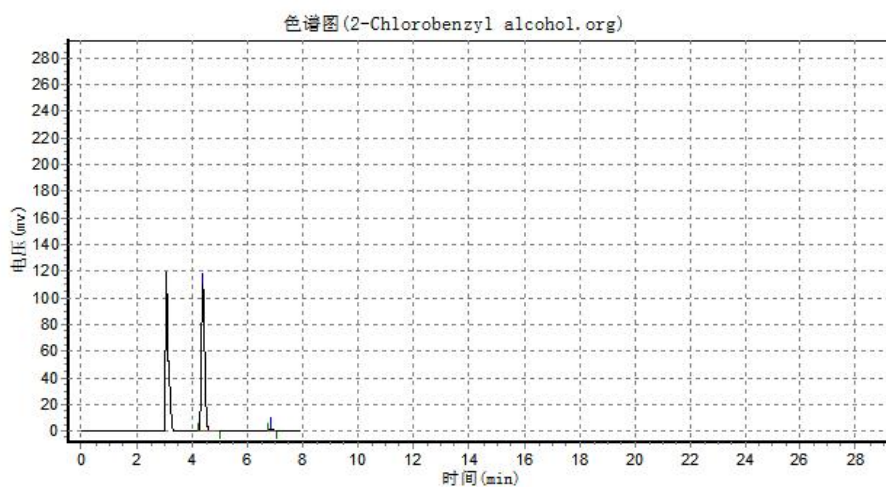

**分析结果表**

| 峰号 | 峰名 | 保留时间  | 峰高         | 峰面积        | 含量       |
|----|----|-------|------------|------------|----------|
| 1  |    | 4.372 | 109465.141 | 905054.063 | 99.0759  |
| 2  |    | 6.862 | 944.988    | 8441.850   | 0.9241   |
| 总计 |    |       | 110410.128 | 913495.912 | 100.0000 |

**Fig.14 GC chromatogram of 2-Chlorobenzyl alcohol at the end of the oxidation reaction (entry 7)**

Column temperature 200 °C, pressure of the carrier gas 0.07Mpa.



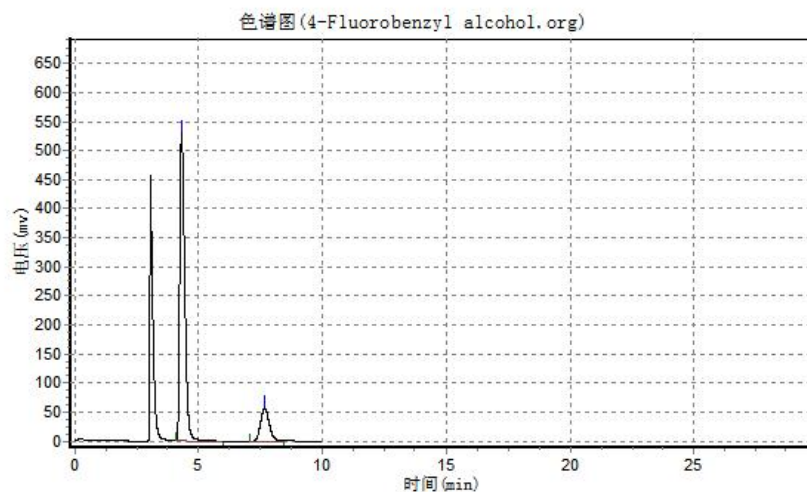

**分析结果表**

| 峰号 | 峰名 | 保留时间  | 峰高         | 峰面积         | 含量       |
|----|----|-------|------------|-------------|----------|
| 1  |    | 4.323 | 530055.875 | 7437329.000 | 83.8629  |
| 2  |    | 7.682 | 56644.910  | 1399934.875 | 15.7856  |
| 总计 |    |       | 587915.554 | 8868434.859 | 100.0000 |

**Fig.15 GC chromatogram of 4-Fluorobenzyl alcohol during the oxidation reaction (entry 8)**

Column temperature 190 °C, pressure of the carrier gas 0.07Mpa.

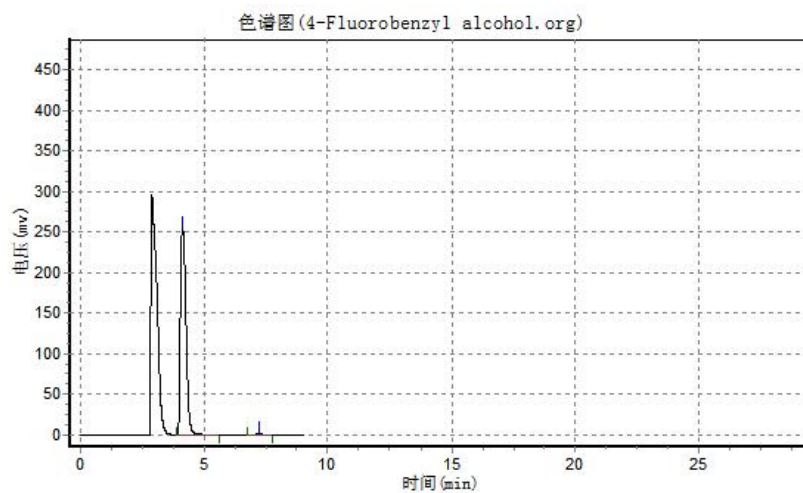

**分析结果表**

| 峰号 | 峰名 | 保留时间  | 峰高         | 峰面积         | 含量       |
|----|----|-------|------------|-------------|----------|
| 1  |    | 4.132 | 254874.375 | 3997335.000 | 99.7924  |
| 2  |    | 7.223 | 420.344    | 8316.600    | 0.2076   |
| 总计 |    |       | 255294.719 | 4005651.600 | 100.0000 |

**Fig.16 GC chromatogram of 4-Fluorobenzyl alcohol at the end of the oxidation reaction (entry 8)**

Column temperature 190 °C, pressure of the carrier gas 0.07Mpa.

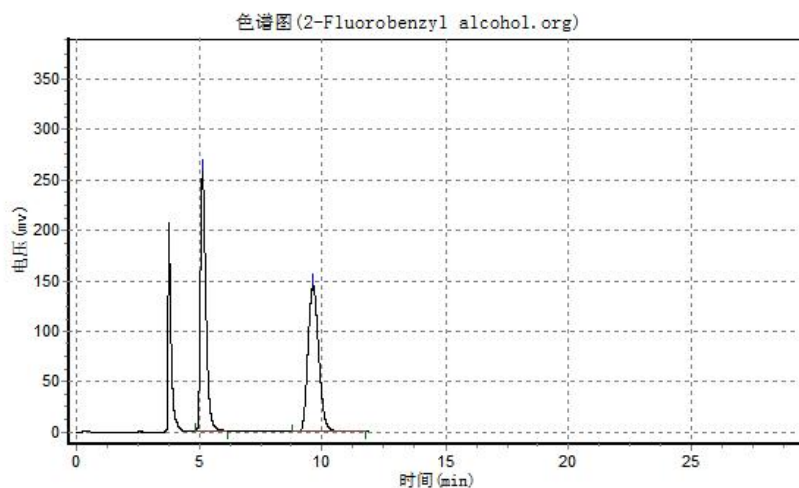

分析结果表

| 峰号 | 峰名 | 保留时间  | 峰高         | 峰面积         | 含量       |
|----|----|-------|------------|-------------|----------|
| 1  |    | 5.103 | 257170.531 | 4018910.000 | 47.6346  |
| 2  |    | 9.638 | 144855.438 | 4418048.500 | 52.3654  |
| 总计 |    |       | 402025.969 | 8436958.500 | 100.0000 |

**Fig.17 GC chromatogram of 2-Fluorobenzyl alcohol during the oxidation reaction (entry 9)**  
 Column temperature 190 °C, pressure of the carrier gas 0.06Mpa.

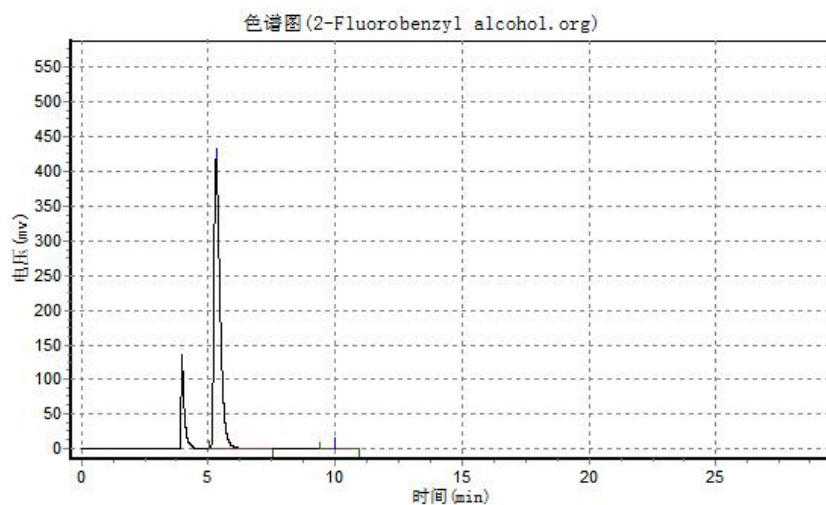

分析结果表

| 峰号 | 峰名 | 保留时间   | 峰高         | 峰面积         | 含量       |
|----|----|--------|------------|-------------|----------|
| 1  |    | 5.332  | 416325.844 | 7015899.500 | 99.6844  |
| 2  |    | 10.040 | 621.868    | 22213.100   | 0.3156   |
| 总计 |    |        | 416947.712 | 7038112.600 | 100.0000 |

**Fig.18 GC chromatogram of 2-Fluorobenzyl alcohol at the end of the oxidation reaction (entry 9)**  
 Column temperature 190 °C, pressure of the carrier gas 0.06Mpa.

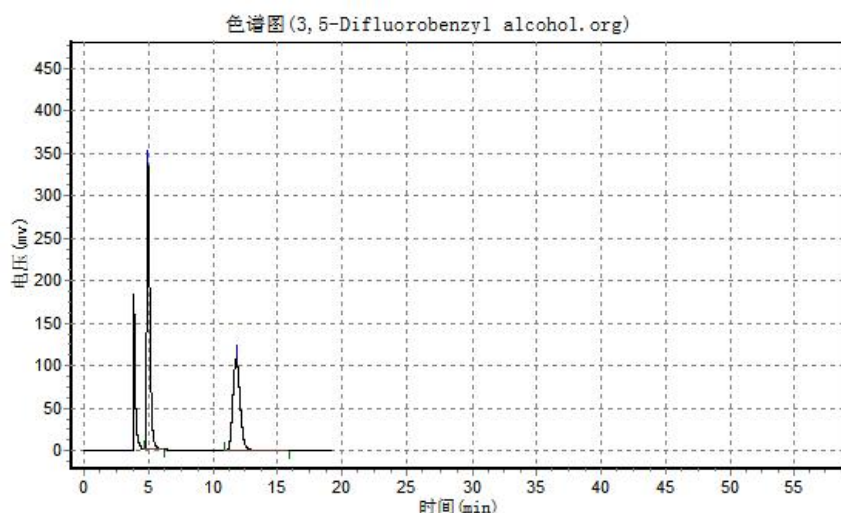

**分析结果表**

| 峰号 | 峰名 | 保留时间   | 峰高         | 峰面积         | 含量       |
|----|----|--------|------------|-------------|----------|
| 1  |    | 4.932  | 336437.406 | 5508594.500 | 56.2222  |
| 2  |    | 11.790 | 108780.055 | 4289304.500 | 43.7778  |
| 总计 |    |        | 445217.461 | 9797899.000 | 100.0000 |

**Fig.19 GC chromatogram of 3,5-Difluorobenzyl alcohol during the oxidation reaction (entry 10)**

Column temperature 180 °C, pressure of the carrier gas 0.07Mpa.

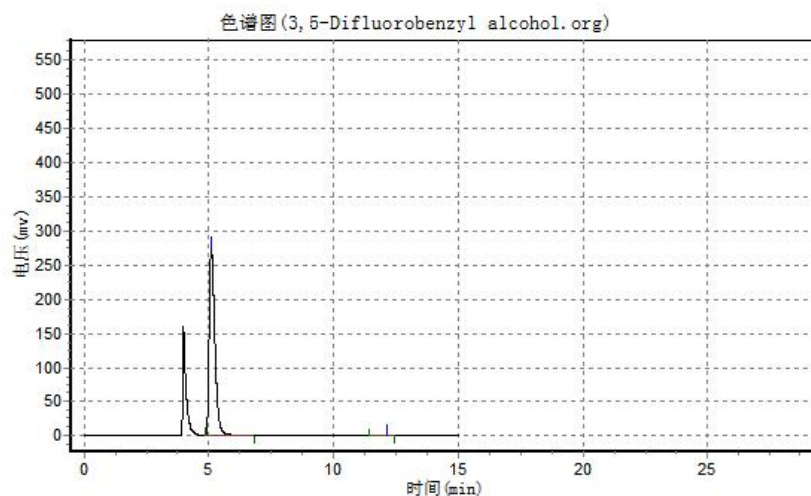

**分析结果表**

| 峰号 | 峰名 | 保留时间   | 峰高         | 峰面积         | 含量       |
|----|----|--------|------------|-------------|----------|
| 1  |    | 5.113  | 271474.219 | 4318657.000 | 99.8691  |
| 2  |    | 12.193 | 164.894    | 5662.092    | 0.1309   |
| 总计 |    |        | 271639.113 | 4324319.092 | 100.0000 |

**Fig.20 GC chromatogram of 3,5-Difluorobenzyl alcohol at the end of the oxidation reaction(entry 10)**

Column temperature 180 °C, pressure of the carrier gas 0.07Mpa.

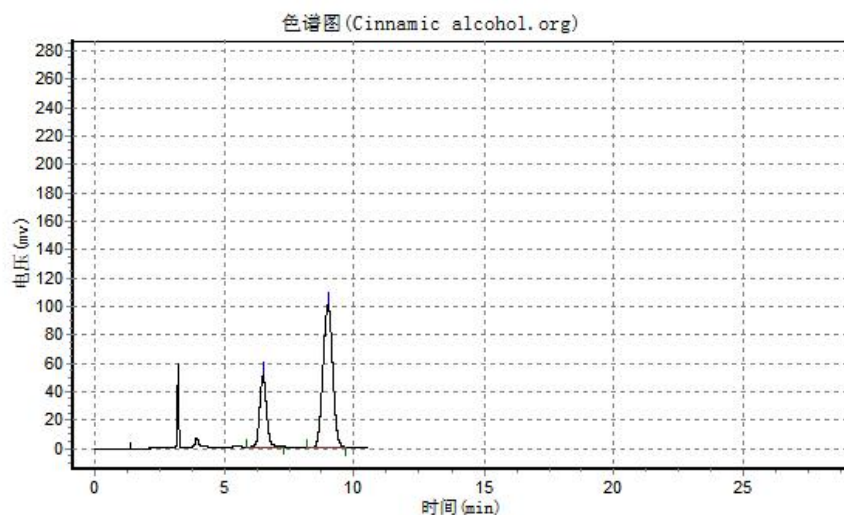

**分析结果表**

| 峰号 | 峰名 | 保留时间  | 峰高         | 峰面积         | 含量       |
|----|----|-------|------------|-------------|----------|
| 1  |    | 6.495 | 50708.320  | 933817.375  | 26.2352  |
| 2  |    | 8.998 | 100567.930 | 2625590.500 | 73.7648  |
| 总计 |    |       | 151276.250 | 3559407.875 | 100.0000 |

**Fig.21 GC chromatogram of Cinnamic alcohol during the oxidation reaction (entry 11)**

The peaks before that of cinnamaldehyde are from the impurities of cinnamic alcohol, not from oxidation by-products.

Column temperature 220 °C, pressure of the carrier gas 0.07Mpa.

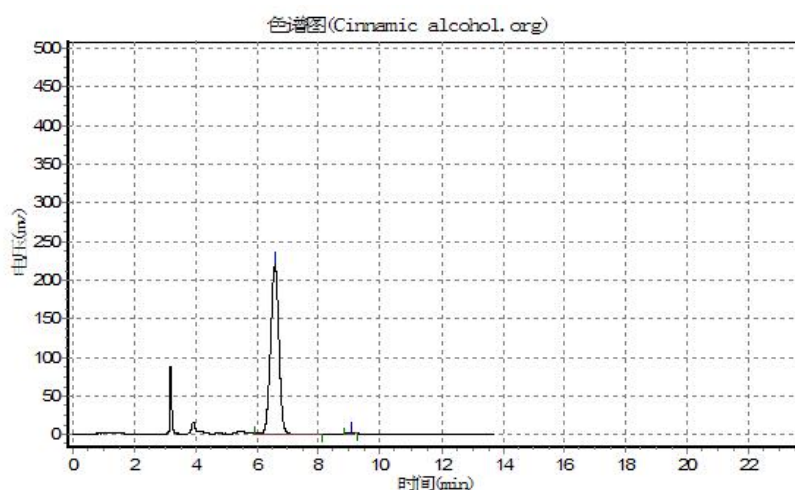

**分析结果表**

| 峰号 | 峰名 | 保留时间  | 峰高         | 峰面积         | 含量       |
|----|----|-------|------------|-------------|----------|
| 1  |    | 6.580 | 218829.063 | 4075351.750 | 99.5837  |
| 2  |    | 9.085 | 1095.710   | 17035.602   | 0.4163   |
| 总计 |    |       | 219924.772 | 4092387.352 | 100.0000 |

**Fig.22 GC chromatogram of Cinnamic alcohol at the end of the oxidation reaction (entry 11)**

The peaks before that of cinnamaldehyde are from the impurities of cinnamic alcohol, not from oxidation by-products.

Column temperature 220 °C, pressure of the carrier gas 0.07Mpa.

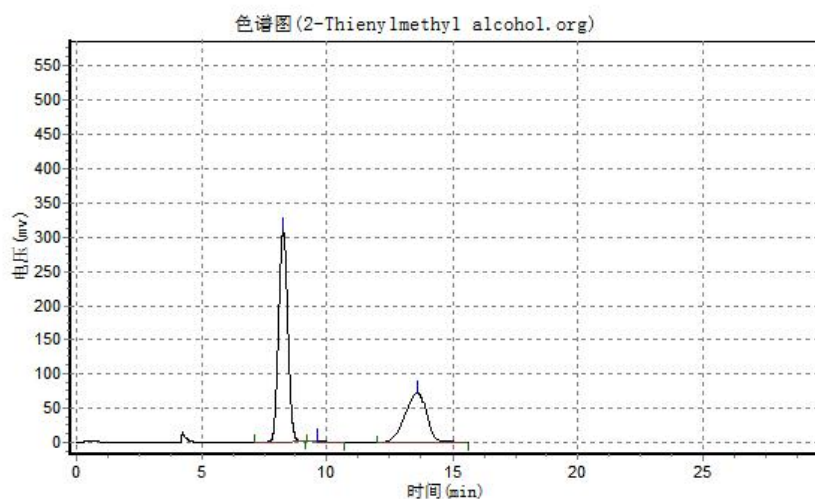

分析结果表

| 峰号 | 峰名 | 保留时间   | 峰高         | 峰面积          | 含量       |
|----|----|--------|------------|--------------|----------|
| 1  |    | 8.252  | 309990.125 | 7885910.500  | 64.8545  |
| 2  |    | 9.613  | 999.341    | 27778.900    | 0.2285   |
| 3  |    | 13.620 | 73096.953  | 4245690.500  | 34.9170  |
| 总计 |    |        | 384086.419 | 12159379.900 | 100.0000 |

**Fig.23 GC chromatogram of 2-Thienylmethyl alcohol during the oxidation reaction (entry 12)**

Column temperature 180 °C, pressure of the carrier gas 0.05Mpa.

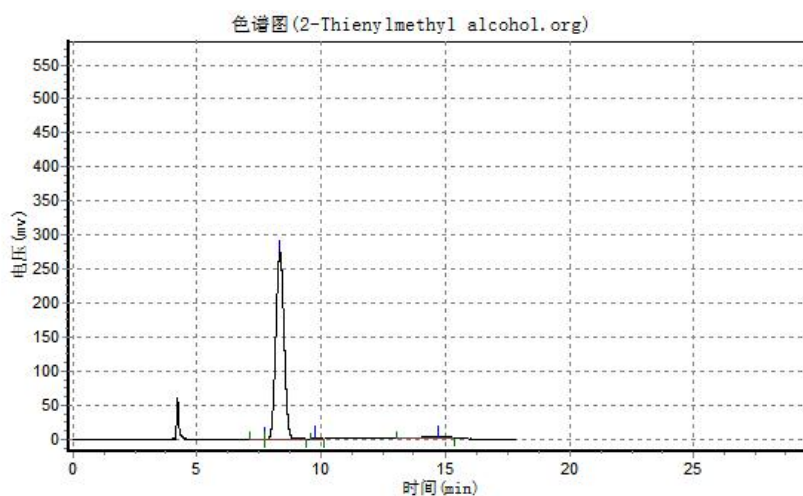

分析结果表

| 峰号 | 峰名 | 保留时间   | 峰高         | 峰面积         | 含量       |
|----|----|--------|------------|-------------|----------|
| 1  |    | 7.722  | 277.419    | 5116.313    | 0.0788   |
| 2  |    | 8.352  | 274746.469 | 6368023.000 | 98.1396  |
| 3  |    | 9.793  | 1338.101   | 38269.980   | 0.5898   |
| 4  |    | 14.685 | 1615.438   | 77330.617   | 1.1918   |
| 总计 |    |        | 277977.427 | 6488739.910 | 100.0000 |

**Fig.24 GC chromatogram of 2-Thienylmethyl alcohol at the end of the oxidation reaction (entry 12)**

Column temperature 180 °C, pressure of the carrier gas 0.05Mpa.

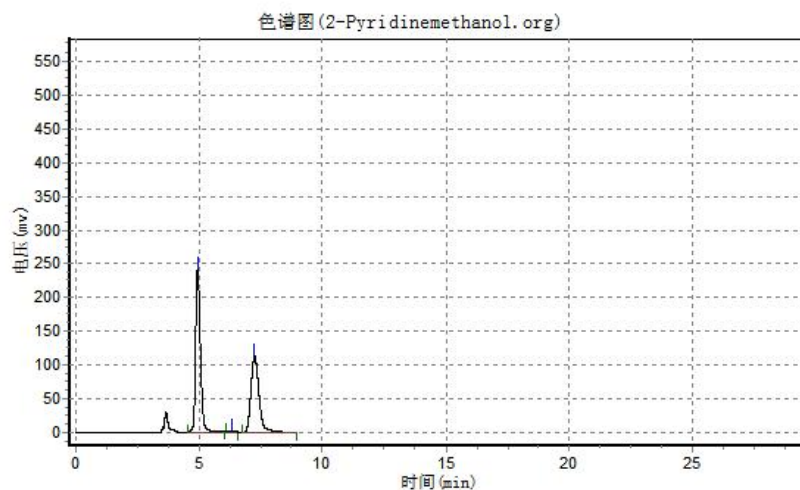

**分析结果表**

| 峰号 | 峰名 | 保留时间  | 峰高         | 峰面积         | 含量       |
|----|----|-------|------------|-------------|----------|
| 1  |    | 4.932 | 242425.641 | 3317229.000 | 56.1067  |
| 2  |    | 6.307 | 1667.761   | 31820.006   | 0.5382   |
| 3  |    | 7.248 | 113607.781 | 2563305.750 | 43.3551  |
| 总计 |    |       | 357701.183 | 5912354.756 | 100.0000 |

**Fig.25 GC chromatogram of 2-Pyridinemethanol during the oxidation reaction (entry 13)**

Column temperature 200 °C, pressure of the carrier gas 0.06Mpa.

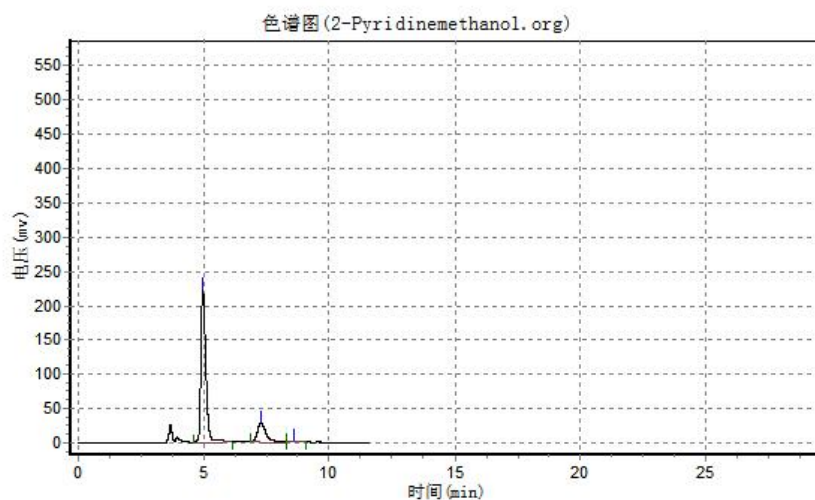

**分析结果表**

| 峰号 | 峰名 | 保留时间  | 峰高         | 峰面积         | 含量       |
|----|----|-------|------------|-------------|----------|
| 1  |    | 4.948 | 222387.016 | 3034811.500 | 81.6869  |
| 2  |    | 7.277 | 27996.998  | 657239.750  | 17.6907  |
| 3  |    | 8.587 | 932.000    | 23123.203   | 0.6224   |
| 总计 |    |       | 251316.014 | 3715174.453 | 100.0000 |

**Fig.26 GC chromatogram of 2-Pyridinemethanol at the end of the oxidation reaction (entry 13)**

Column temperature 200 °C, pressure of the carrier gas 0.06Mpa.

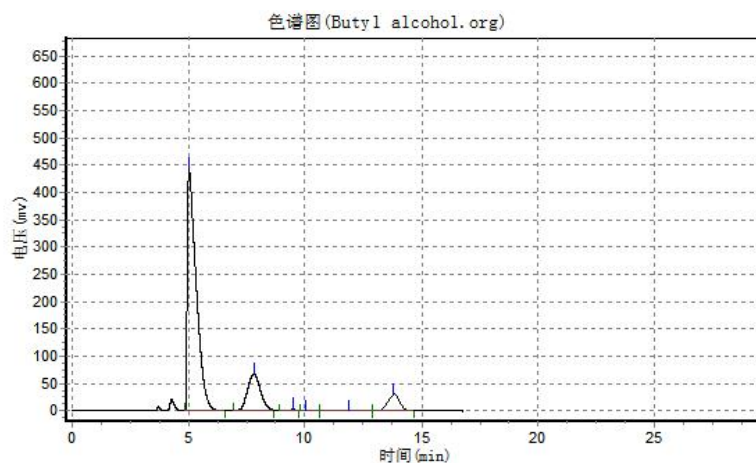

**分析结果表**

| 峰号 | 峰名 | 保留时间   | 峰高         | 峰面积          | 含量       |
|----|----|--------|------------|--------------|----------|
| 1  |    | 5.010  | 443248.188 | 11705907.000 | 75.3489  |
| 2  |    | 7.818  | 67211.484  | 2612646.500  | 16.8172  |
| 3  |    | 9.473  | 3368.980   | 76097.477    | 0.4898   |
| 4  |    | 10.055 | 1660.689   | 44571.164    | 0.2869   |
| 5  |    | 11.880 | 748.368    | 49637.137    | 0.3195   |
| 6  |    | 13.815 | 30427.277  | 1046748.813  | 6.7377   |
| 总计 |    |        | 546664.987 | 15535608.090 | 100.0000 |

**Fig.27 GC chromatogram of Butyl alcohol during the oxidation reaction (entry 14)**

Column temperature 80 °C for nine minutes, and then heated up to 130 for ten minutes, pressure of the carrier gas 0.05Mpa.

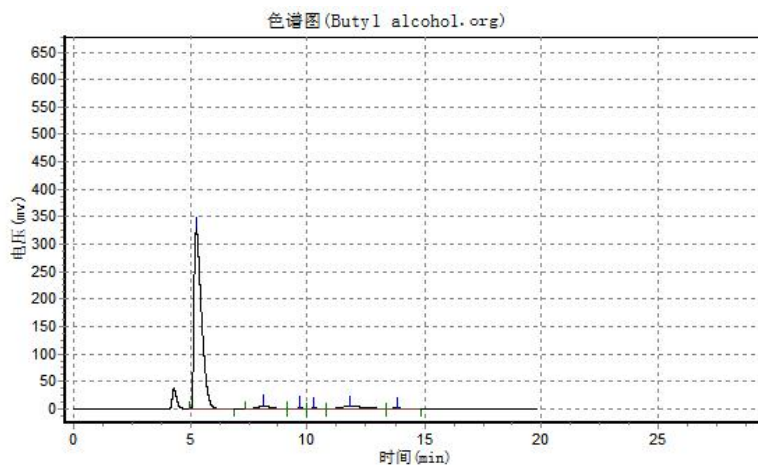

**分析结果表**

| 峰号 | 峰名 | 保留时间   | 峰高         | 峰面积         | 含量       |
|----|----|--------|------------|-------------|----------|
| 1  |    | 5.267  | 327694.063 | 7277973.500 | 91.4639  |
| 2  |    | 8.135  | 4920.243   | 193511.000  | 2.4319   |
| 3  |    | 9.682  | 1614.617   | 38230.555   | 0.4805   |
| 4  |    | 10.282 | 1463.491   | 38255.066   | 0.4808   |
| 5  |    | 11.883 | 5831.147   | 364483.750  | 4.5805   |
| 6  |    | 13.827 | 1169.062   | 44758.121   | 0.5625   |
| 总计 |    |        | 342692.623 | 7957211.992 | 100.0000 |

**Fig.28 GC chromatogram of Butyl alcohol at the end of the oxidation reaction (entry 14)**

Column temperature 80 °C for nine minutes, and then heated up to 130 for ten minutes, pressure of the carrier gas 0.05Mpa.

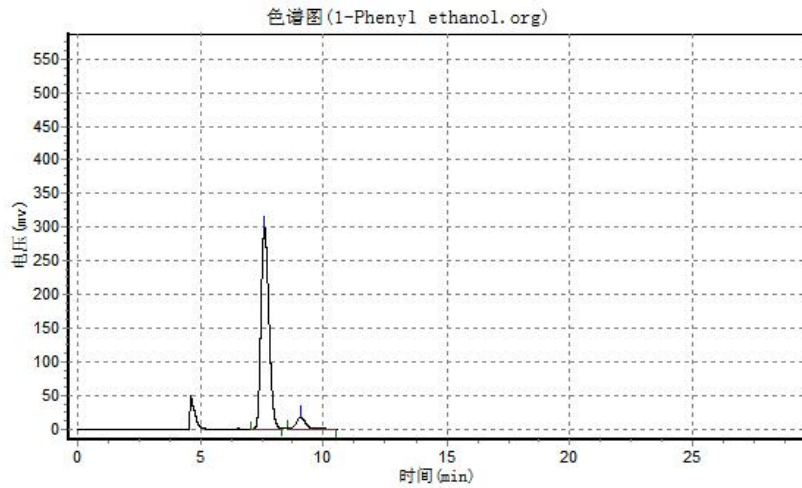

**分析结果表**

| 峰号 | 峰名 | 保留时间  | 峰高         | 峰面积         | 含量       |
|----|----|-------|------------|-------------|----------|
| 1  |    | 7.623 | 299075.938 | 6712977.500 | 93.3371  |
| 2  |    | 9.098 | 17621.625  | 479207.688  | 6.6629   |
| 总计 |    |       | 316697.563 | 7192185.188 | 100.0000 |

**Fig.29 GC chromatogram of 1-Phenyl ethanol during the oxidation reaction (entry 15)**

Column temperature 190 °C, pressure of the carrier gas 0.05Mpa.

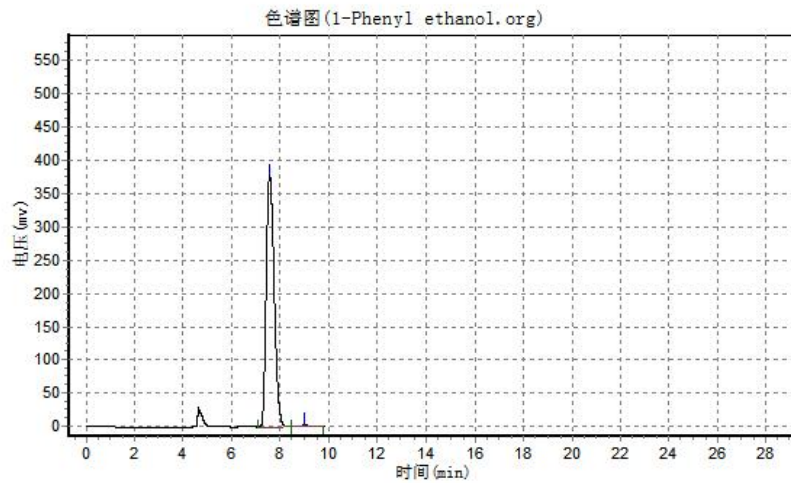

**分析结果表**

| 峰号 | 峰名 | 保留时间  | 峰高         | 峰面积         | 含量       |
|----|----|-------|------------|-------------|----------|
| 1  |    | 7.590 | 378003.969 | 8543892.000 | 99.3962  |
| 2  |    | 9.032 | 1991.797   | 51904.500   | 0.6038   |
| 总计 |    |       | 379995.766 | 8595796.500 | 100.0000 |

**Fig.30 GC chromatogram of 1-Phenyl ethanol at the end of the oxidation reaction (entry 15)**

Column temperature 190 °C, pressure of the carrier gas 0.05Mpa.



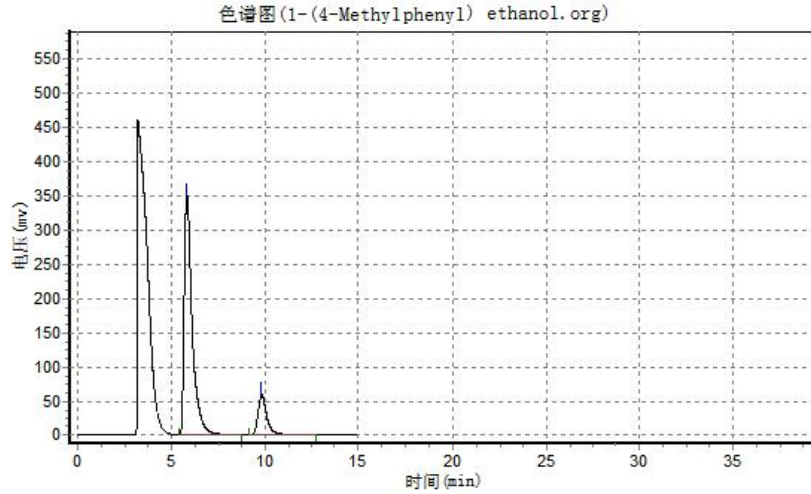

分析结果表

| 峰号 | 峰名 | 保留时间  | 峰高         | 峰面积          | 含量       |
|----|----|-------|------------|--------------|----------|
| 1  |    | 5.813 | 348807.813 | 10428237.000 | 84.2092  |
| 2  |    | 9.818 | 58448.250  | 1955484.750  | 15.7908  |
| 总计 |    |       | 407256.063 | 12383721.750 | 100.0000 |

**Fig.31 GC chromatogram of 1-(4-Methylphenyl) ethanol during the oxidation reaction (entry 16)**

Column temperature 190 °C, pressure of the carrier gas 0.05Mpa.

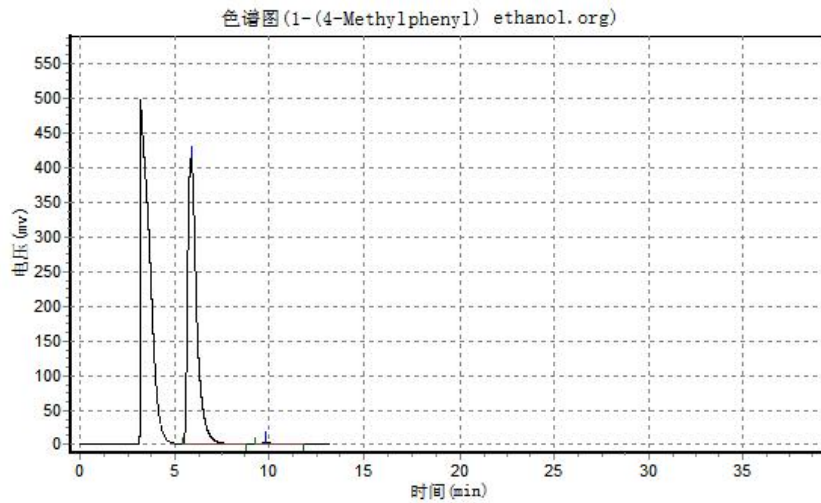

分析结果表

| 峰号 | 峰名 | 保留时间  | 峰高         | 峰面积          | 含量       |
|----|----|-------|------------|--------------|----------|
| 1  |    | 5.873 | 412634.813 | 13586706.000 | 99.1399  |
| 2  |    | 9.815 | 3403.510   | 117875.203   | 0.8601   |
| 总计 |    |       | 416038.322 | 13704581.203 | 100.0000 |

**Fig.32 GC chromatogram of 1-(4-Methylphenyl) ethanol at the end of the oxidation reaction (entry 16)**

Column temperature 190 °C, pressure of the carrier gas 0.05Mpa.

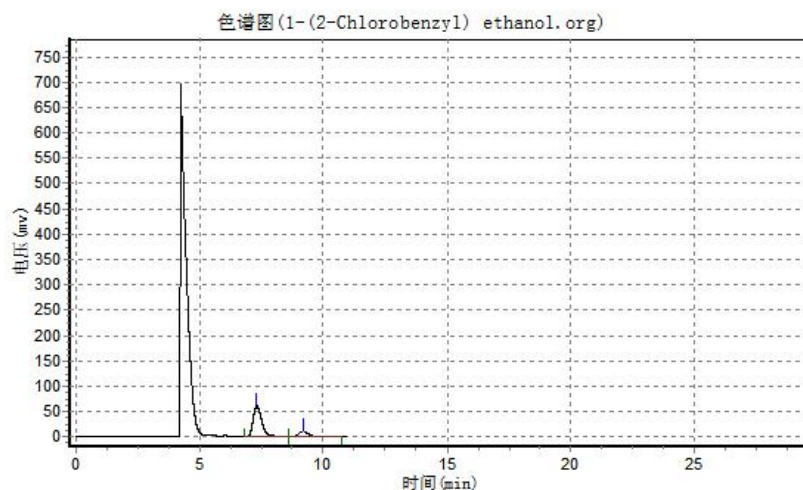

**分析结果表**

| 峰号 | 峰名 | 保留时间  | 峰高        | 峰面积         | 含量       |
|----|----|-------|-----------|-------------|----------|
| 1  |    | 7.307 | 61829.156 | 1493178.500 | 81.5734  |
| 2  |    | 9.182 | 11417.462 | 337293.688  | 18.4266  |
| 总计 |    |       | 73246.618 | 1830472.188 | 100.0000 |

**Fig.33 GC chromatogram of 1-(2-Chlorobenzyl) ethanol during the oxidation reaction (entry 17)**

Column temperature 200 °C, pressure of the carrier gas 0.05Mpa.

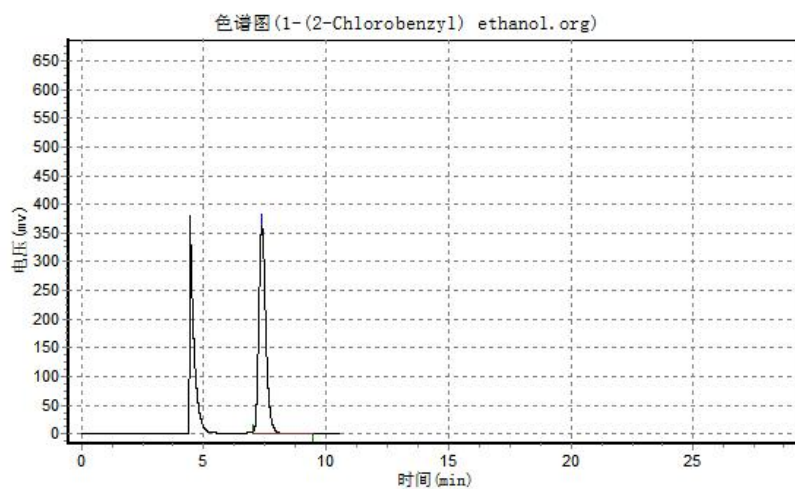

**分析结果表**

| 峰号 | 峰名 | 保留时间  | 峰高         | 峰面积         | 含量       |
|----|----|-------|------------|-------------|----------|
| 1  |    | 7.388 | 362473.594 | 7204524.500 | 100.0000 |
| 总计 |    |       | 362473.594 | 7204524.500 | 100.0000 |

**Fig.34 GC chromatogram of 1-(2-Chlorobenzyl) ethanol at the end of the oxidation reaction (entry 17)**

Column temperature 200 °C, pressure of the carrier gas 0.05Mpa.

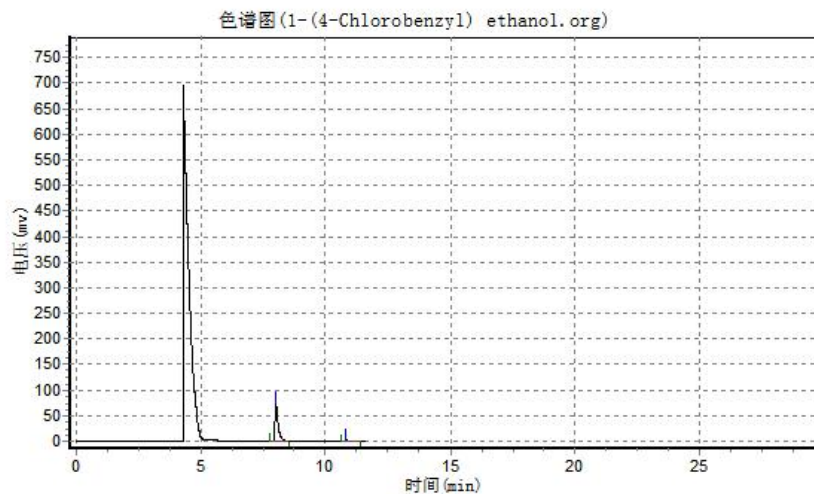

**分析结果表**

| 峰号 | 峰名 | 保留时间   | 峰高        | 峰面积        | 含量       |
|----|----|--------|-----------|------------|----------|
| 1  |    | 8.017  | 73835.141 | 676720.750 | 93.6884  |
| 2  |    | 10.815 | 4480.933  | 45589.500  | 6.3116   |
| 总计 |    |        | 78316.073 | 722310.250 | 100.0000 |

**Fig.35 GC chromatogram of 1-(4-Chlorobenzyl) ethanol during the oxidation reaction (entry 18)**

Column temperature 220 °C, pressure of the carrier gas 0.05Mpa.

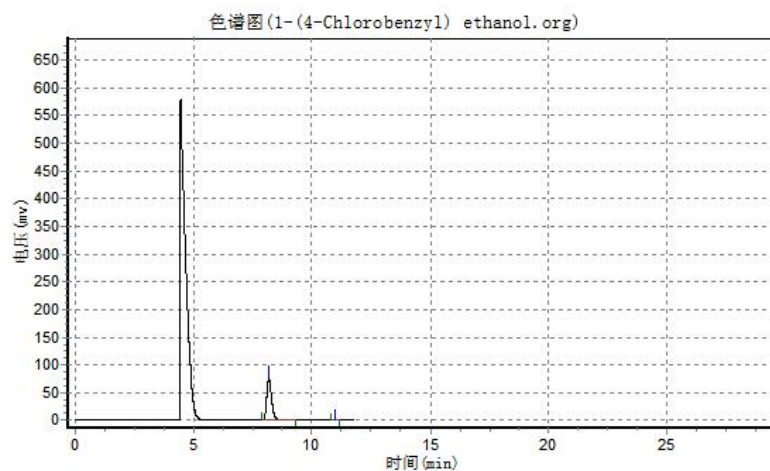

**分析结果表**

| 峰号 | 峰名 | 保留时间   | 峰高        | 峰面积         | 含量       |
|----|----|--------|-----------|-------------|----------|
| 1  |    | 8.180  | 76253.844 | 1114635.125 | 99.3173  |
| 2  |    | 10.967 | 624.603   | 7662.400    | 0.6827   |
| 总计 |    |        | 76878.447 | 1122297.525 | 100.0000 |

**Fig.36 GC chromatogram of 1-(4-Chlorobenzyl) ethanol at the end of the oxidation reaction (entry 18)**

Column temperature 220 °C, pressure of the carrier gas 0.05Mpa.

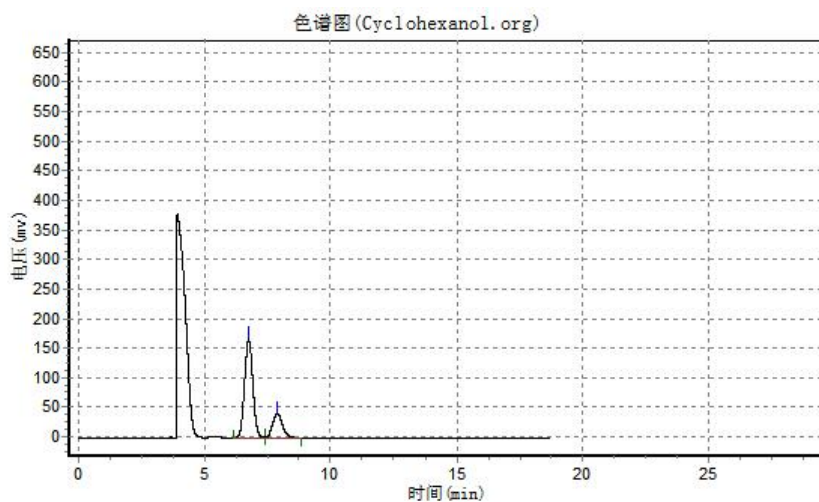

分析结果表

| 峰号 | 峰名 | 保留时间  | 峰高         | 峰面积         | 含量       |
|----|----|-------|------------|-------------|----------|
| 1  |    | 6.773 | 166566.969 | 3811774.000 | 77.7560  |
| 2  |    | 7.895 | 40816.520  | 1090450.625 | 22.2440  |
| 总计 |    |       | 207383.488 | 4902224.625 | 100.0000 |

**Fig.37 GC chromatogram of Cyclohexanol during the oxidation reaction (entry 19)**

Column temperature 130 °C, pressure of the carrier gas 0.05Mpa.

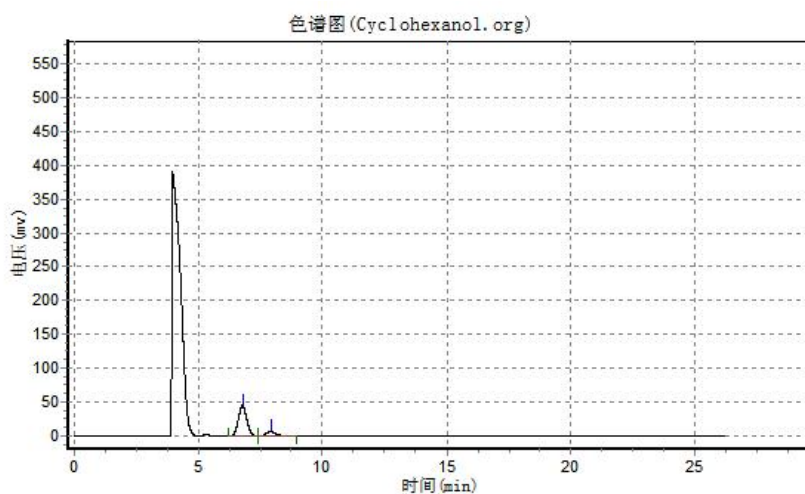

分析结果表

| 峰号 | 峰名 | 保留时间  | 峰高        | 峰面积         | 含量       |
|----|----|-------|-----------|-------------|----------|
| 1  |    | 6.773 | 44956.000 | 1065849.125 | 86.1400  |
| 2  |    | 7.915 | 6080.000  | 171496.094  | 13.8600  |
| 总计 |    |       | 51036.000 | 1237345.219 | 100.0000 |

**Fig.38 GC chromatogram of Cyclohexanol at the end of the oxidation reaction (entry 19)**

Column temperature 130 °C, pressure of the carrier gas 0.05Mpa.

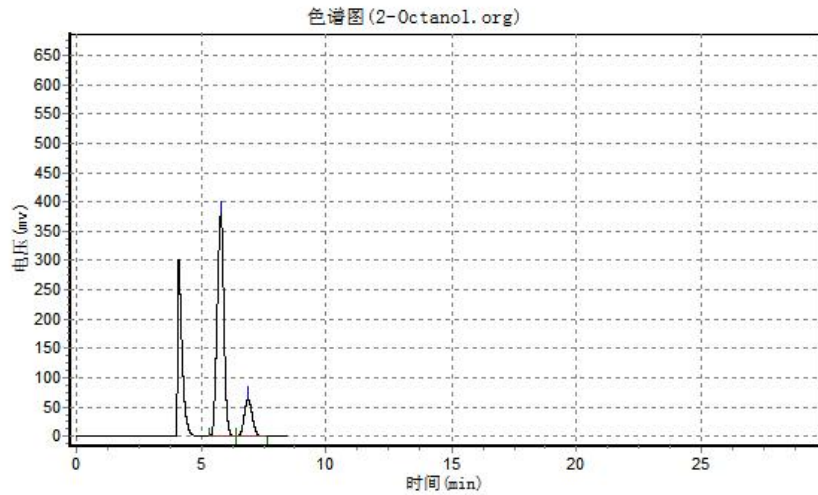

分析结果表

| 峰号 | 峰名 | 保留时间  | 峰高         | 峰面积         | 含量       |
|----|----|-------|------------|-------------|----------|
| 1  |    | 5.770 | 379129.875 | 7089576.000 | 83.3407  |
| 2  |    | 6.863 | 63079.438  | 1417165.875 | 16.6593  |
| 总计 |    |       | 442209.313 | 8506741.875 | 100.0000 |

**Fig.39 GC chromatogram of 2-Octanol during the oxidation reaction (entry 20)**

Column temperature 130 °C, pressure of the carrier gas 0.05Mpa.

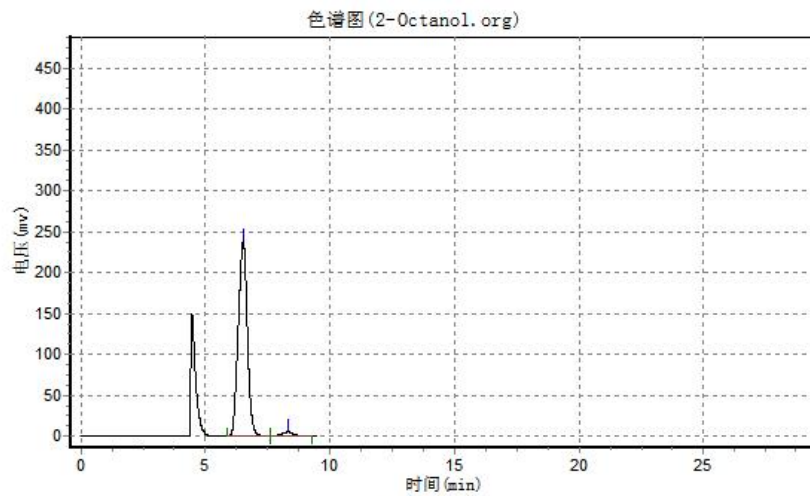

分析结果表

| 峰号 | 峰名 | 保留时间  | 峰高         | 峰面积         | 含量       |
|----|----|-------|------------|-------------|----------|
| 1  |    | 6.538 | 237979.391 | 6046603.000 | 97.0681  |
| 2  |    | 8.323 | 5360.894   | 182632.000  | 2.9319   |
| 总计 |    |       | 243340.285 | 6229235.000 | 100.0000 |

**Fig.40 GC chromatogram of 2-Octanol at the end of the oxidation reaction (entry 20)**

Column temperature 130 °C, pressure of the carrier gas 0.05Mpa.

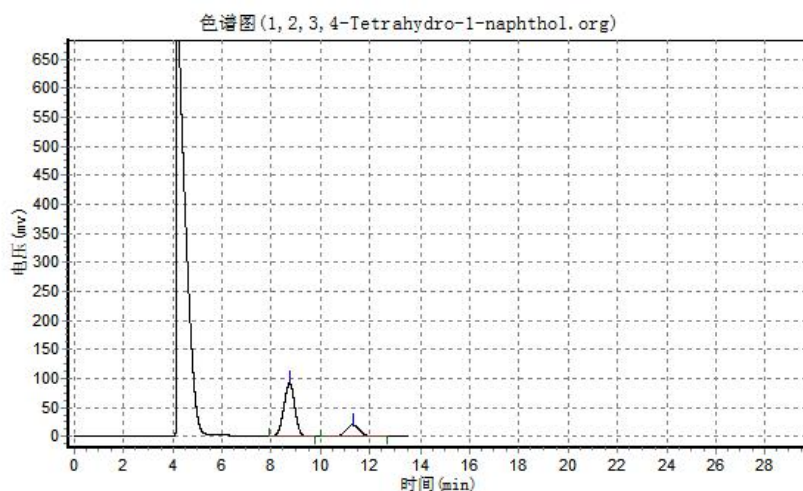

**分析结果表**

| 峰号 | 峰名 | 保留时间   | 峰高         | 峰面积         | 含量       |
|----|----|--------|------------|-------------|----------|
| 1  |    | 8.757  | 92403.992  | 2820720.500 | 78.2793  |
| 2  |    | 11.298 | 19958.123  | 782686.125  | 21.7207  |
| 总计 |    |        | 112362.115 | 3603406.625 | 100.0000 |

**Fig.41 GC chromatogram of 1,2,3,4-Tetrahydro-1-naphthol during the oxidation reaction (entry 21)**

Column temperature 210 °C, pressure of the carrier gas 0.05Mpa.

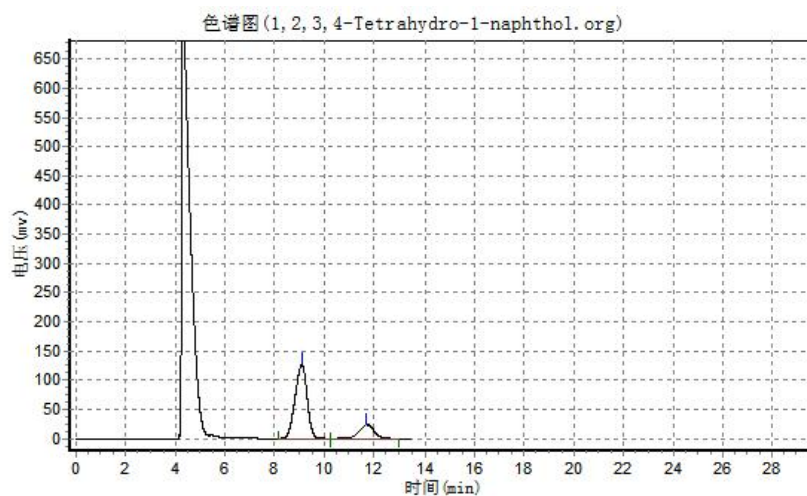

**分析结果表**

| 峰号 | 峰名 | 保留时间   | 峰高         | 峰面积         | 含量       |
|----|----|--------|------------|-------------|----------|
| 1  |    | 9.107  | 127236.914 | 4258014.500 | 80.7984  |
| 2  |    | 11.715 | 23967.617  | 1011912.000 | 19.2016  |
| 总计 |    |        | 151204.531 | 5269926.500 | 100.0000 |

**Fig.42 GC chromatogram of 1,2,3,4-Tetrahydro-1-naphthol at the end of the oxidation reaction (entry 21)**

Column temperature 210 °C, pressure of the carrier gas 0.05Mpa.

### Effect of temperature on catalytic activity

**Table 6.** Effect of temperature on the DES-TEMPO/Fe(NO<sub>3</sub>)<sub>3</sub> catalyzed aerobic oxidation of benzyl alcohol<sup>a</sup>.

| T(°C) | Time(h) | Conv. <sup>b</sup> (%) | Select. <sup>b</sup> (%) | TON <sup>c</sup> | TOF <sup>d</sup> (h <sup>-1</sup> ) |
|-------|---------|------------------------|--------------------------|------------------|-------------------------------------|
| 80    | 0.5     | >99                    | >99                      | 39.6             | 79.2                                |
| 70    | 1       | >99                    | >99                      | 39.6             | 39.6                                |
| 60    | 1.5     | >99                    | >99                      | 39.6             | 26.4                                |
| 50    | 2       | >99                    | >99                      | 39.6             | 19.8                                |
| 45    | 2.25    | >99                    | >99                      | 39.6             | 17.6                                |
| 40    | 9       | 31.5                   | >99                      | 12.6             | 1.4                                 |
| 25    | 1       | 8.1                    | >99                      | 3.2              | 3.2                                 |

<sup>a</sup> Reaction conditions: benzyl alcohol 10 mmol, 1.25%DES-TEMPO, 3%Fe(NO<sub>3</sub>)<sub>3</sub>, atmospheric oxygen pressure. <sup>b</sup> Conversions and selectivity were determined by GC (area normalization method). <sup>c</sup> TON = moles of product/2(moles of DES-TEMPO). <sup>d</sup> TOF = TON/reaction time.
